# Supplementary material for: Cell lineage-dependent chiral actomyosin flows drive cellular rearrangements in early Caenorhabditis elegans development
Source: eLife journal article supplement (doi:10.7554/elife.54930), 2020-07-09
Supplement: supp [file elife-54930-supp-v1.zip]

Archive with 41 entries (41 files):
- elife_poa_e54930_Video_1.avi
- elife_poa_e54930_Video_2.avi
- elife_poa_e54930_Video_3.avi
- elife_poa_e54930_Video_4.avi
- elife_poa_e54930_Video_5.avi
- elife_poa_e54930_Video_6.mp4
- elife_poa_e54930_Video_7.mp4
- elife_poa_e54930_Video_8.mp4
- elife_poa_e54930_Video_9.avi
- elife_poa_e54930_Video_10.avi
- elife_poa_e54930_Video_11.avi
- elife_poa_e54930_Video_12.avi
- elife_poa_e54930_Video_13.avi
- elife_poa_e54930_Video_14.avi
- elife_poa_e54930_Video_15.avi
- elife_poa_e54930_Video_16.avi
- elife_poa_e54930_Video_17.avi
- elife_poa_e54930_Video_18.avi
- elife_poa_e54930_Video_19.avi
- elife_poa_e54930_Video_20.avi
- elife_poa_e54930_Video_21.avi
- elife_poa_e54930_Source_code_1.zip
- elife_poa_e54930_Figure_1_figure_supplement_1.pdf
- elife_poa_e54930_Figure_1_figure_supplement_2.pdf
- elife_poa_e54930_Figure_1_figure_supplement_3.pdf
- elife_poa_e54930_Figure_1_figure_supplement_4.pdf
- elife_poa_e54930_Figure_1_figure_supplement_5.pdf
- elife_poa_e54930_Figure_1_figure_supplement_6.pdf
- elife_poa_e54930_Figure_1_figure_supplement_7.pdf
- elife_poa_e54930_Figure_1_figure_supplement_8.pdf
- elife_poa_e54930_Figure_1_figure_supplement_9.pdf
- elife_poa_e54930_Figure_1_figure_supplement_10.pdf
- elife_poa_e54930_Figure_3_figure_supplement_1.pdf
- elife_poa_e54930_Figure_3_figure_supplement_2.pdf
- elife_poa_e54930_Figure_4_figure_supplement_1.pdf
- elife_poa_e54930_Figure_4_figure_supplement_2.pdf
- elife_poa_e54930_Figure_5_figure_supplement_1.pdf
- elife_poa_e54930_Figure_5_figure_supplement_2.pdf
- elife_poa_e54930_Figure_5_figure_supplement_3.pdf
- elife_poa_e54930_Transparent_Reporting_File.docx
- elife_poa_e54930_Source_Data_1.xlsx
