# Supplementary material for: Cell lineage-dependent chiral actomyosin flows drive cellular rearrangements in early Caenorhabditis elegans development
Source: eLife journal article supplement (doi:10.7554/elife.54930), 2020-07-09

# A

## Flow types during early cell divisions of the nematode

1. 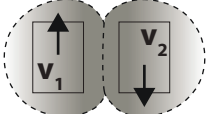 **Chiral counter-rotating flow**  $v_c = \vec{e}_z \cdot (\vec{e}_x \times \vec{v}_2 - \vec{e}_x \times \vec{v}_1)$

2. 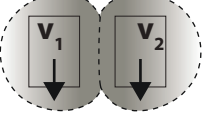 **Net-rotating flow**  $v_r = \vec{e}_z \cdot (\vec{e}_x \times \vec{v}_2 + \vec{e}_x \times \vec{v}_1)$

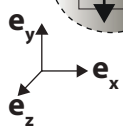

**B**

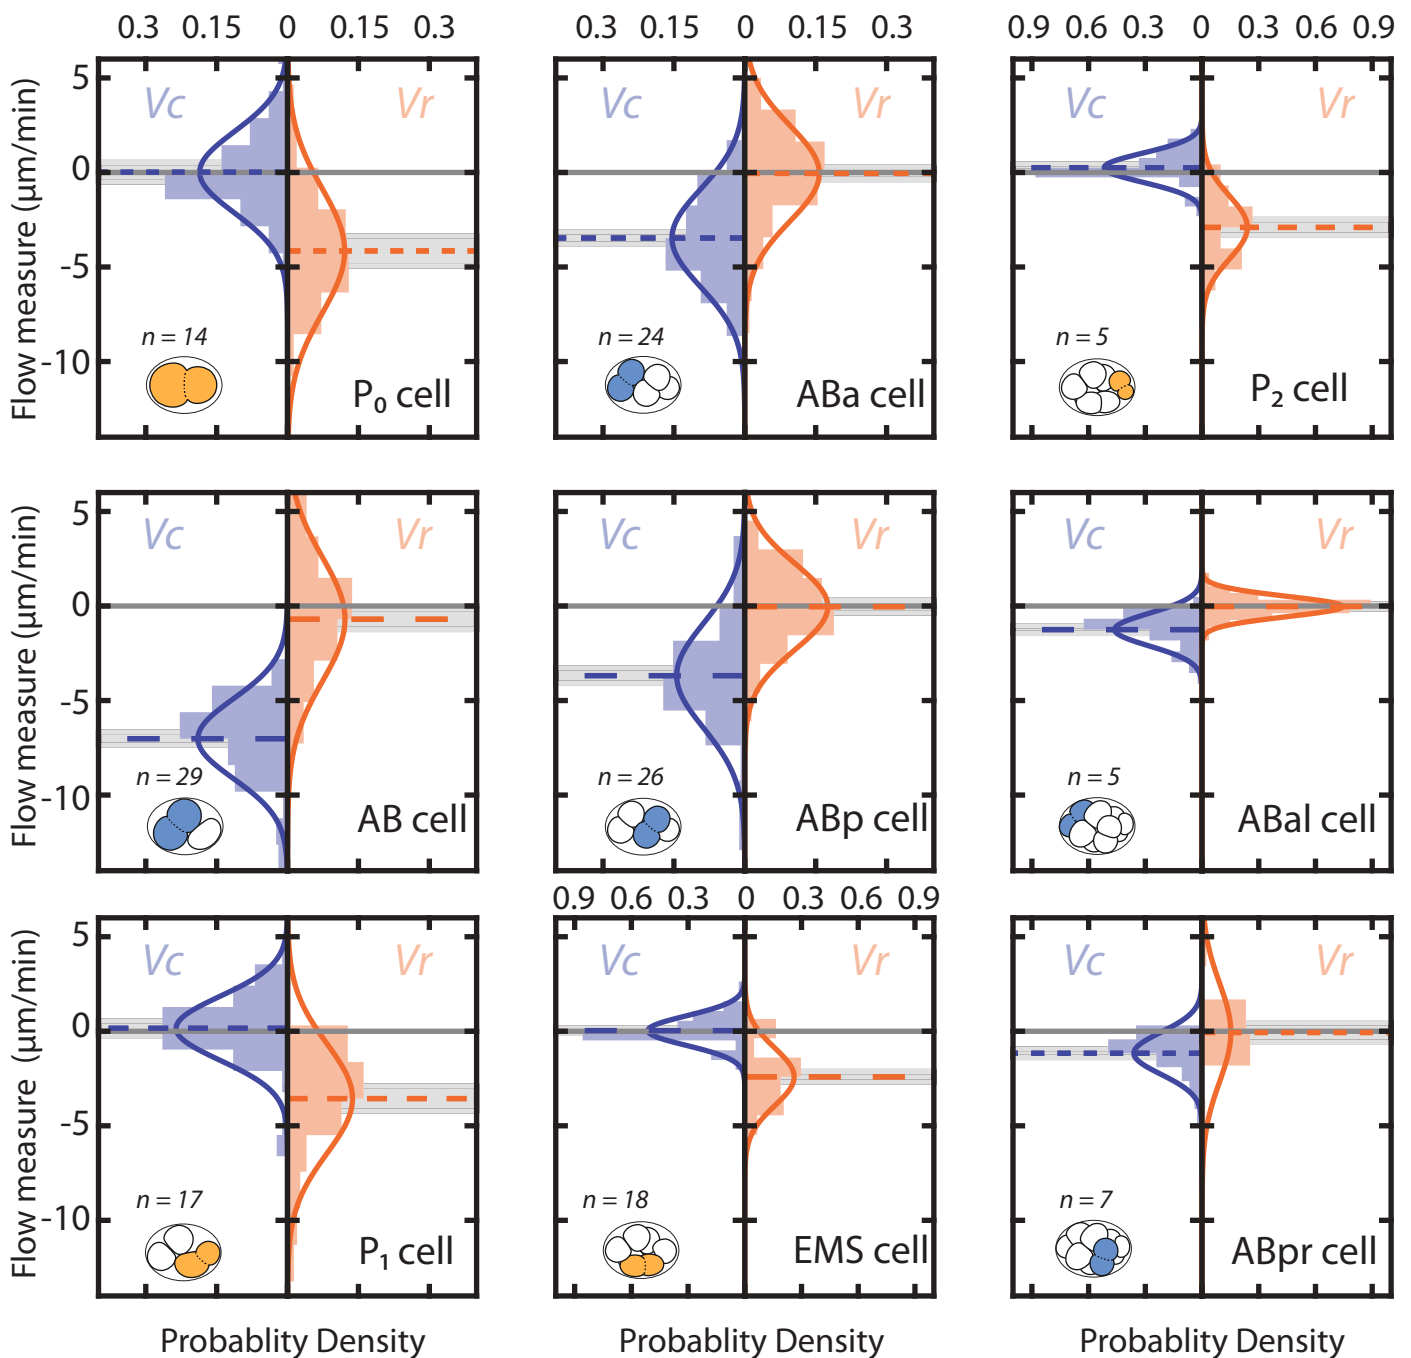

Supplement: supp [file elife-54930-supp-v1.zip › elife_poa_e54930_Figure_1_figure_supplement_4.pdf]
