# Supplementary material for: Cell lineage-dependent chiral actomyosin flows drive cellular rearrangements in early Caenorhabditis elegans development
Source: eLife journal article supplement (doi:10.7554/elife.54930), 2020-07-09
Supplement: supp [file elife-54930-supp-v1.zip › elife_poa_e54930_Source_Data_1.xlsx]

## Sheet: Figure1 
		Chiral counter-rotating flow velocity (indvidual values) - (um/min)											Mean Line Profiles for the first 6 cell divisions along the long axis							Cyokinetic ring position				Myosin ratios during cell division
	P0	AB	P1	Aba	Abp	EMS	P2	Abal	Abpr			P0 cell	AB cell	P1 cell	Aba cell	Abp cell	EMS cell
																				mean ring position	error at 95% CI			Mean ratio	error at 95% CI
Mean	0.01	-7.01	0.15	-3.46	-3.68	0.03	0.25	-1.16	-1.24										P0	0.611056	0.0160607		P0	1.67151	0.297498
Error at 95% interval	0.51	0.34	0.38	0.33	0.41	0.14	0.19	0.22	0.19										AB	0.490298	0.0104949		AB	1.00916	0.239902
																			P1	0.628673	0.018227		P1	2.07076	0.305223
	0.6126	-5.4897	1.0889	-1.7191	-2.0945	0.975	0.1727	-0.9894	-0.9894										ABA	0.497875	0.0113756		ABA	0.929933	0.24325
	-1.2816	-5.6336	0.7835	-3.3354	-4.3976	0.9787	0.2277	-1.7101	-1.7101			26.6545	29.4439	35.8997	21.3613	18.584	41.1391		ABP	0.515775	0.0178184		ABP	1.00579	16.8103
	-1.0452	-6.7901	-0.3183	-3.149	-2.3174	0.9715	0.8734	-2.0244	-0.0244			28.7146	31.2032	37.328	24.6208	20.9573	37.6277		EMS	0.597194	0.00933825		EMS	1.68791	15.6485
	0.7783	-6.701	0.5673	-4.973	-3.9633	0.9862	-1.4099	-1.7037	-1.7037			31.6166	34.5057	39.1122	26.0925	22.6843	35.8569
	0.5338	-6.771	0.5853	-6.1132	-1.9046	-0.0331	-1.4042	-1.3748	-1.3748			35.5731	35.7858	41.1725	26.1496	23.4926	34.2214
	0.3768	-4.1877	-0.6922	-8.1882	-4.4431	-0.1231	0.0484	-1.2641	-1.2641			41.4952	35.858	42.269	26.913	24.0804	34.3574
	-2.8873	-4.2882	2.583	-5.4471	-7.0905	-0.175	0.451	-1.7201	-1.7201			46.4717	37.5327	42.2801	28.4186	24.2284	33.1034
	2.0048	-5.1792	0.5506	-4.7092	-4.8854	-0.0381	1.9334	-0.8557	0.1294			47.9697	38.2548	42.2143	30.6229	24.1271	31.5333
	-0.8191	-5.9338	1.1283	-4.4421	-4.4504	0.9111	0.1048	-0.7423	-3.4539			43.9666	38.2689	42.9991	29.084	24.7714	30.9876
	-0.2296	-4.9478	-0.3137	-3.6277	-2.5102	1.3178	0.6054	-0.7677	-3.9479			43.1057	38.4365	43.341	30.1234	25.3016	30.9862
	-0.6198	-6.1251	0.6503	-3.8575	-1.886	0.63	-1.6721	-0.6597	-3.634			44.475	39.9988	43.4693	31.1681	24.82	32.4133
	2.245	-6.783	2.1376	-5.1503	-2.233	1.5315	-0.9484	-0.9096	-4.1902			42.4528	41.6835	43.8666	31.8358	25.8882	34.1656
	0.5271	-7.2438	0.1502	-4.8267	-3.0781	0.3877	0.3114	-0.8671	-1.9956			40.4913	41.6802	43.8865	33.4215	26.8972	35.3088
	2.6248	-8.0929	-1.0525	-5.9027	0.147	1.5093	0.8742	-0.9905	-0.7057			40.3958	42.5907	46.4619	33.3868	26.1241	32.1278
	-1.1095	-5.254	0.2412	-2.5247	-2.0945	1.5705	0.9934	-0.9169	-0.5923			41.4447	43.4401	48.1972	33.354	26.6916	32.9992
	-2.8881	-7.2814	0.3577	-4.1454	-4.3976	0.5852	0.9933	-1.3911	-0.6177			41.7019	45.4089	47.7721	34.7165	27.894	33.8373
	-2.3185	-7.69	-0.3103	-4.5584	-2.3174	1.4375	1.1239	-1.1481	-0.5097			42.0978	44.8778	46.2732	34.475	28.3854	33.735
	-1.7215	-7.5306	-1.1746	-3.645	-3.9633	1.167	0.8165	-0.8324	-0.7596			42.9658	44.6553	45.8875	35.3803	27.8506	33.9109
	-1.0549	-8.5013	0.2134	-4.2671	-1.9046	1.0681	0.0364	-0.9485	-0.7171			42.7418	46.4485	45.877	39.1114	27.6398	35.2151
	-1.0389	-8.8567	-0.0495	-2.9136	-4.4431	0.5363	0.0827	-0.7526	-0.8405			41.521	48.8305	46.1489	39.6603	28.6424	34.9484
	-0.3905	-8.5901	1.3208	-5.4038	-7.0905	-0.3418			-0.7669			41.095	50.2805	46.9779	38.6236	28.0638	36.1976
	0.4417	-7.9309	-0.9923	-2.5247	-4.8854	-1.0692			-1.2411			41.0588	51.584	46.9345	37.9597	28.6971	36.5789
	2.6975	-5.1289	1.783	-2.1454	-4.4504	0.0495			-0.9981			40.0542	53.1784	48.0576	38.431	29.5827	34.5475
	0.4294	-4.9286	-1.0022	-2.5584	-2.5102	-0.0569			-0.6824			38.9626	54.2662	45.655	40.0711	30.9546	36.092
	6.5613	-7.4481	1.222	-1.422	-1.886	0.0051			-0.7985			36.7417	55.3609	43.6197	42.2235	31.9371	38.5456
	4.489	-4.8503	2.6206	-4.2671	-2.233	-0.003			-0.6026			38.0435	55.8728	44.3207	43.9185	31.7014	40.0053
	-0.562	-7.7041	1.4787	-2.9136	-3.0781	-0.0652			-0.5189			39.3861	57.3837	46.7406	45.0522	30.2818	39.8607
	7.0277	-6.3961	3.1189	-5.4038	0.147	0.6435			-2.5088			39.1325	58.7143	48.9218	46.8268	32.3036	38.5771
	2.947	-6.9312	1.4026	-1.7191	-2.4526	-1.9037			-2.1778			39.338	63.8634	48.796	47.797	33.4701	38.4757
	2.7321	-6.4214	2.7355	-3.3354	-4.0438	-0.355			-1.2822			39.9616	69.6483	49.7072	46.5167	32.6116	42.2257
	-0.4479	-5.1088	-5.6175	-3.149	-3.6883	-0.1854						41.3932	73.9892	48.7826	46.0871	32.9948	45.8279
	0.5635	-4.7816	-6.3761	-4.973	-5.3884	-0.2497						42.5363	74.974	47.644	47.5121	34.3822	46.8319
	-1.5356	-4.7705	0.0049	-6.1132	-6.2713	-0.6604						43.2597	73.0129	47.7602	49.642	35.0609	46.2415
	-1.9268	-5.7773	-0.5755	-8.1882	-5.1824	-1.1539						45.3055	75.4117	50.5294	48.5371	35.167	46.9823
	-0.9792	-5.3513	-4.5333	-5.4471	-5.7429	-1.0913						43.8082	79.7806	52.0754	49.9223	35.1377	44.9082
	1.7036	-5.9463	-0.1124	-4.7092	-3.696	-0.4607						44.051	83.616	53.1075	50.8243	36.7715	46.0107
	-1.3453	-11.271	-1.0632	-4.4421	-2.7911	-0.536						45.1159	89.6647	54.2481	53.726	38.841	46.0707
	-0.7763	-6.6028	-0.7128	-3.6277	-2.0744	-1.083						47.4393	97.194	55.0427	56.8521	38.8203	47.3873
	-0.5306	-6.9754	0.663	-3.8575	-1.3036	-1.2306						48.663	105.382	54.564	59.4094	39.9096	53.8854
	0.8211	-7.8237	2.8799	-5.1503	-0.8806	0.6206						47.9526	113.064	54.056	64.3644	42.7631	54.9194
	3.3696	-6.0956	2.8036	-4.8267	-0.5416	0.7884						46.7623	119.273	52.7744	68.2487	44.3296	52.49
	0.8581	-11.6294	3.6612	-5.9027	-2.784	-0.0495						48.112	126.209	57.0242	69.3283	46.3225	55.0966
	2.9473	-11.5084	-1.4738	-6.1688	-3.2426	-0.2071						49.0802	133.545	62.139	71.8153	50.2754	53.3741
	-5.2123	-13.593	0.2947	-7.8301	-4.0643	-0.0308						48.6301	137.404	62.5025	75.3495	55.1267	53.2394
	-1.609	-8.7296	0.2573	-8.1574	-3.8047	0.1209						50.8627	141.232	62.9751	82.662	61.0036	51.7576
	0.3238	-6.9266	-0.9215	-11.3642	-7.1737	0.1309						52.5527	146.578	62.3932	91.4945	70.1251	51.7934
	-3.465	-6.2667	-0.6671	-8.0236	-7.1091	-0.0435						53.8579	146.572	62.5298	100.01	79.2249	52.6983
	-3.2009	-6.9492	0.1957	-8.5572	-5.9603	-0.2179						55.3728	145.357	64.1174	109.675	90.2836	55.2089
	-0.1647	-8.8002	1.7681	-6.81	-5.7325	-0.1308						54.0772	144.621	66.7421	117.047	98.4194	59.0907
	-1.9046	-4.2931	0.7441	-7.6068	-5.7471	-1.9037						51.5728	142.878	69.1081	124.125	107.653	66.2376
	-1.3942	-8.5143	-1.2691	-4.1879	-4.6186	-0.355						54.1208	143.77	69.908	131.254	114.684	75.6397
	-1.9672	-6.6154	-1.395	-1.841	-3.1061	-0.1854						55.7082	145.893	67.5667	135.719	115.678	85.649
	-0.3158	-8.6885	-1.4695	-1.0789	-1.2942	0.7503						58.8099	149.83	69.285	136.524	114.144	91.4938
	-1.7974	-9.0404	-0.5474	-2.5672	-2.21	0.3396						67.1741	151.452	71.1966	133.097	113.416	91.0169
	-0.9633	-4.9687	1.879	-2.3641	-0.5982	-1.1539						70.2113	150.526	72.7792	128.848	108.629	91.2047
	-1.6614	-6.7209	-0.4959	-1.1287	-1.2858	-1.0913						72.9562	152.174	72.4907	123.912	99.3961	101.442
	0.312	-7.2572	1.0746	0.7021	-2.3264	0.5393						78.9375	146.732	72.0457	115.469	90.7416	105.248
	-1.1752	-12.2259	-0.5829	2.8605	-3.9688	0.464						87.7497	142.459	70.7945	105.695	80.8196	112.247
	-0.8589	-8.3344	-0.4	2.2787	-3.0368	-0.083						97.32	139.572	72.0613	97.4737	74.1049	111.965
	2.3019	-10.8775	0.3066	2.0462	-1.0432	-1.2306						102.882	135.378	71.6939	91.3477	67.3243	117.214
	-2.2785	-13.2688	-0.3213	0.673	-0.6026	0.6206						108.226	132.807	69.2685	87.8023	61.5381	132.579
	-0.959	-5.1985	0.9421	1.1783	-2.3506	0.7884						110.448	127.899	69.8246	84.1096	58.7441	150.152
	2.9303	-6.3249	-0.4778	0.4701	-2.2207	0.9505						106.708	119.18	69.1291	79.923	55.4547	156.039
	-0.1521	-13.9272	0.5954	-1.5481	-3.5642	-0.2956						99.8183	109.465	66.3756	73.2126	49.9251	151.4
	1.4622	-5.4701	1.288	-5.9931	-3.7944	-0.3134						96.7537	99.6807	66.0317	67.2254	44.2274	140.662
	1.2364	-5.5252	0.6553	-6.291	-1.8018	-0.0866						94.9749	95.7095	66.8456	62.1305	41.9784	132.697
	-0.0152	-7.9023	0.9221	-3.0086	-6.3469	0.1094						93.7402	93.1052	69.6891	58.788	40.1091	117.515
	-0.3866	-7.1853	-0.426	-4.4669	-5.9495	0.0657						91.752	90.4159	68.7931	54.871	39.1704	99.5214
	0.9912	-7.8407	-2.475	-4.5293	-2.8947	-0.2002						88.3535	86.448	64.1177	52.4375	37.9841	85.9927
		-8.9995	-1.3125	-5.8899	-1.9541	-0.0458						82.8358	80.3879	59.3795	50.7799	37.4399	68.1265
		-4.1009	0.1968	-4.6219	-3.6241	-0.1347						76.7934	78.0337	56.5615	50.4124	36.9775	53.9158
		-4.5601	0.1234	-0.284	-1.2698	-0.0251						75.3682	75.2942	54.3196	47.3131	36.0584	43.5946
		-6.3498	0.0427	-0.1098	1.8411	-0.1547						75.1985	73.5521	52.731	46.4423	34.7806	37.6983
		-6.0238	0.0774	4.9593	2.503	-0.1024						75.1653	70.2683	50.5989	45.2079	33.5373	35.5759
		-7.5968	-0.4942	0.8868	2.5177	-0.0584						76.1025	68.335	46.6816	44.1117	33.5754	34.6967
		-6.8733	1.4381	0.0983	2.509	-0.1662						72.2637	66.1849	45.6158	41.4937	34.0783	32.1612
		-8.458	2.2752	0.5392	2.3397	-0.1135						64.3045	66.4438	44.8374	39.6199	34.4201	30.0713
		-8.4344		-1.236	2.2437	0.3967						58.107	67.047	42.8169	39.3909	34.0511	29.3133
		-8.0751		0.5535	1.9861	-1.5206						51.5373	65.0153	41.228	38.0893	32.9713	27.5148
		-5.9726		0.0922	2.2413	0.5411						47.7017	60.0779	38.4409	36.7615	31.7115	27.0321
		-5.4607		-0.256	1.8418	-0.4985						46.0407	56.0032	36.3933	36.2112	30.566	25.0913
		-5.5084		-2.7437	1.9461	-0.4427						43.6718	53.7853	33.6932	36.6774	30.4387	24.5776
		-5.9044		-5.1316	1.0956	-0.3551						40.0629	52.554	31.7329	36.1373	29.7637	24.4008
		-5.1552		-4.1197	1.0686	-2.1601						38.5245	50.5217	29.5913	35.6428	29.64	23.2905
		-3.4353		-2.7818	0.8173	0.9902						37.3216	51.0035	27.4588	33.8381	28.6862	23.884
		-5.1585		-2.8422	0.9211	-1.9724						35.5098	51.8031	25.3981	33.2107	28.7895	23.1324
		-6.1421		-2.3683	-3.41	-0.274						34.7581	50.6236	24.8341	33.4146	27.9545	22.7347
		-4.7573		-3.3403	-3.6501	2.1485						33.4524	48.5361	24.1115	32.6372	28.5609	22.5492
		-6.0436		-4.0175	-4.345	1.243						31.6296	47.5438	23.4401	32.6621	28.4033	21.9477
		-6.0427		-1.4886	-3.6202	-1.0498						30.7426	45.2149	22.9848	32.2943	28.8546	21.9303
		-7.2341		-4.4481	-3.1381	0.1957						28.9984	46.1134	22.6282	32.6773	28.1042	22.2244
		-8.0057		-1.9054	-3.5808	-1.0381						27.6005	46.2488	21.7324	33.1217	27.0905	22.1444
		-9.2771		-0.0946	-4.158	-0.0889						27.3683	45.394	20.5846	32.1157	26.4018	21.9249
		-9.6344		-1.9054	-4.4878	0.3178						28.2617	42.9341	19.7725	30.9195	26.0547	21.4306
		-13.754		-0.0946	-4.8633	-0.37						28.7905	39.2908	19.2751	30.4555	25.9996	21.7987
		-9.0356		-1.9054	-4.8288	0.5315						28.6283	37.2888	18.8444	30.6516	25.3393	21.6418
		-9.7323		-0.0946	-2.8233	0.3877						28.2144	35.3626	18.0691	29.1412	25.93	21.3037
		-8.6601		-1.9054	-2.402	0.5093						26.6857	32.6411	16.9559	29.5934	26.862	21.1917
		-4.9196		-0.0946	-0.7958	0.5705						24.7029	30.8816	15.8399	27.3865	25.9851	20.8863
		-5.4869		-1.9054	-1.3941	-0.4148						22.3684	30.0167	14.9841	25.408	24.3512	21.1248
		-6.4615		-0.0946	-3.0024	0.4375						21.4584	28.89	13.3925	23.5783	23.9174	20.5954
		-7.2989		-5.8996	-5.9468	0.167
		-6.577		-5.7865	-4.4962	0.0681
		-8.7349		-5.9701	-4.9868	-0.4637
		-8.3617		-6.4286	-6.0465	-0.3418
		-3.9122		-5.6692	-5.8074	2.2277
		-3.9209		-6.1105	-5.238	0.2264
		-4.9691		-5.3934	-6.3858	-0.0136
		-4.3827		-6.5925	-5.7708	0.0389
		-3.9858		-4.3529	-7.1707	-0.0205
		-5.2466		-2.9316	-6.4979	-0.0434
		-5.9414		-2.0717	-4.0813	-0.0095
		-4.5255		-3.8163	-5.6046	-0.038
		-4.548		-2.2853	-8.8606	0.0063
		-8.8709		-2.4476	-2.4526	-0.013
		-9.8362		-2.8483	-4.0438	-0.0492
		-12.5689		-2.6207	-3.6883	0.0096
		-4.4152		-2.8477	-5.3884	-0.0434
		-6.4107		-1.5518	-6.2713	-0.0401
		-6.1284		-2.0845	-5.1824
		-7.0887		-2.5594	-5.7429
		-7.0328		-2.172	-3.696
		-7.6736		-0.7008	-2.7911
		-6.2011		-1.2688	-2.0744
		-6.3391		-1.6859	-1.3036
		-5.3092		-2.0272	-0.8806
		-6.6261		-0.3087	-0.5416
		-5.8775		-5.3147	-2.784
		-4.1262		-4.526	-11.846
		-6.5754		-3.2618	-9.8502
		-5.7788		-4.3207	-9.6865
		-8.9338		-3.6765	-10.4486
		-9.6775		-0.2196	-12.2581
		-6.3771		-2.674	-12.3626
		-7.617		-3.2499	-4.8526
		-6.7322		-3.0465	-7.6514
		-9.0073		-3.9065	-7.4575
		-8.3358		-3.5859	-5.5305
		-6.9282		-0.1228	-2.4486
		-7.2116
		-9.017
		-6.2554
		-5.5427
		-6.3673
		-6.6363
		-6.5683
		-9.1046
		-5.3884
		-6.3487
		-6.2928
		-6.9336
		-5.4611
		-5.5991
		-4.5692
		-5.8861
		-5.1375
		-3.3862
		-5.8354
		-5.0388
		-8.1938
		-8.9375
		-5.6371
		-6.877
		-5.9922
		-8.2673
		-7.5958
		-6.1882
		-6.4716
		-8.277
		-5.5154
		-4.8027
		-5.6273
		-5.8963
		-5.8283

## Sheet: Figure2
	VC (counter-rotating flows)	VR (net-rotating flows)		Mean Spindle skew	Error at 95% CI
	um/min	um/min		degrees
P0	0.0138	-4.1481		2.38175	1.67
AB	-7.0172	-0.7011		37.509	2.51
P1	0.1582	-3.5601		2.25363	0.66
Aba	-3.89465	-0.0492		27.6417	2.29
Abp	-3.6829	-0.0328		23.9853	1.19
EMS	0.0445	-2.4089		2.46809	1.25
P2	0.2531	-2.9065		4.36003	1.67
Abar	-1.2481	-0.0257		17.7312	1.98
Abpr	-1.1632	-0.0646		15.421	3.51
						Also see figure 5 for spindle skews in development

## Sheet: Figure3
		Spindle skew for the 2nd and 3rd cell division								Chiral counter-rotating flow velocity
	par2-cell1 (degrees)	par2-cell2 (degrees)	control-AB (degrees)	control-P1 (degrees)	par6-cell1 (degrees)	par6cell2 (degrees)			par2-cell1 (um/min)	par2-cell2 (um/min)	control-AB (um/min)	control-P1 (um/min)	par6-cell1 (um/min)	par6cell2 (um/min)		XY-skew	par2-cell1 (degrees)	par2-cell2 (degrees)	wt-AB (degrees)	wt-P1 (degrees)
Mean	25.3551	21.5635	34.4051	8.49471	9.00426	7.65977		Mean	-6.53	-6.67	-8.445	0.3245	0.07	-0.85		Mean	25.37	19.8	36.67	6.41
Error at 95% CI	4.30693	4.54835	1.152	1.25272	2.86395	1.17559		Error at 95% CI	1.13	0.8	0.57	0.32	0.71	1.13		Error at 95% CI	6.7	8.13	7.38	4.34
	1.80005	47.6958	34.1591	9.64643	7.19638	5.99534			-13.9041	-7.1042	-5.4897	1.0889	3.9188	-6.7537			18.993	14.546	41.8309	-10.6725
	50.3254	8.67745	38.2629	10.0272	9.20279	11.8134			-12.1391	-8.2172	-5.6336	0.7835	2.3066	-2.1306			17.102	12.024	48.001	-4.4372
	14.6397	44.4768	37.9772	9.11496	6.86783	3.97099			-12.0073	-5.8933	-6.7901	-0.3183	3.0458	-0.8238			35.857	32.638	50.101	-3.8696
	10.2469	19.8992	28.2537	14.0532	6.53122	6.66792			-10.1673	-5.624	-6.701	0.5673	3.2426	-5.1038			24.441	27.693	36.005	-8.3464
	30.0908	6.66792	34.7786	4.18143	22.4273	10.2463			-12.0626	-3.8199	-6.771	0.5853	6.1414	-4.803			17.388	28.678	47.755	-10.9444
	44.4768	12.2827	31.6419	5.21987	1.80005	7.26462			-9.5296	0.1101	-4.1877	-0.6922	0.5695	-4.7927			38.445	3.272	25.926	-5.3622
	27.261	24.676	34.8839	7.21983					-7.6029	2.7726	-4.2882	2.583	2.51	-2.3938			29.283	17.293	28.253	-4.9038
	21.2873	19.0514	35.2837						-1.9035	-4.2598	-5.1792	0.9516	3.8423	3.8265			23.2937	25.2938	30.2221	-0.0158
	12.2884	8.67745							-3.1304	-3.8873	-5.9338	1.4102	0.6934	-1.7986					10.028	-2.492
	42.2937	36.8105							-2.1539	-6.4033	-4.9478	2.4355	-0.1231	-0.1367					48.843	-0.0136
	19.2736	8.28362							-3.3966	-7.7855	-6.1251	1.8479	-0.933	1.1429
	30.2774								-3.3776	-5.4504	-6.783	1.5634	-1.8321	-0.6129
									-4.196	-4.267	-7.2438	1.0539	-1.4073	-1.1498
									-5.2213	-6.1693	-8.0929	1.3488	-1.604	0.4332		YZ-skew	par2-cell1 (degrees)	par2-cell2 (degrees)	wt-AB (degrees)	wt-P1 (degrees)
									-6.6828	-6.8451	-5.254	-0.4738	8.0992	-2.8802
									-7.0048	-8.1477	-7.2814	-0.2947	-0.7721	-3.426		Mean	26.93	27.44	31.2831	5.028
									-12.1729	-6.8314	-7.69	-0.2573	-0.5309	-3.6735		Error at 95% CI	6.7	8.66	11.05	1.8
									-12.0819	-2.3907	-7.5306	0.0785	-1.9757	-2.5253
									-15.7541	-5.9158	-8.5013	-0.6671	-1.2559	0.768			36.705	42.4992	35.12	3.9067
									-16.0504	-2.7884	-8.8567	0.1957	-0.6137	-2.4839			38.821	34.298	42.266	8.8253
									-12.5536	-7.9726	-8.5901	1.7681	-0.1645	-1.1115			21.5427	12.3447	20.01	4.854
									-3.1695	-7.6459	-4.1009	0.7441	-3.264	-0.4515			30.392	43.884	33.544	3.2631
									-3.2472	-9.9753	-4.5601	-1.8221	-2.2827	-3.2485			34.441	29.844	46.052	6.2937
									-3.9754	-12.4094	-6.3498	-1.395	-1.9792	-1.4541			23.615	25.01	24.956	3.2735
									-4.6929	-9.2011	-6.0238	-1.4695	0.8967	4.9776			12.01	17.567	41.01	8.2837
									-8.3304	-6.8264	-7.5968	-0.5474	0.1828	1.5064			17.975	14.101
									-8.9512	-6.6537	-6.8733	1.879	2.5832	-1.4198
									-10.0462	-8.7905	-8.458	-0.4959	-5.1503	-6.5892
									-0.1058	-11.4996	-12.6856	1.0746	-1.2879	7.1344
									-0.3276	-12.9616	-13.2964	-0.5829	-2.2909	7.4072
									-2.808	-10.5904	-10.2141	-0.4	-1.8672	4.1672
									-2.8239	-11.0415	-9.9646	0.3066	-2.0388	-2.4323
									-0.8302	-10.2263	-9.82	-0.3213	-1.3481	-3.1641
									-1.1966	-12.2481	-8.9218	0.9421	-1.702	0.1796
									-3.2221	-13.816	-8.996	-0.4778	-2.1259	-5.4425
									-4.854	-5.543	-4.9196	0.5954	-4.9232	6.5297
									-3.1498	-5.863	-5.4869	1.288	-1.8143	5.5273
									-3.1785	-8.0111	-6.4615	0.6553	-0.8951	7.763
									-2.8408	-7.1218	-7.2989	0.9221	0.1781	-1.2158
									-5.655	-5.2763	-6.577	-0.426	0.3763	-1.8622
									-4.6761	-3.8055	-8.7349	-2.475	0.6364	-3.5774
									-5.15	-3.0259	-8.3617	-1.3125	-1.2327	-6.2023
									-9.1245	-7.1127	-14.1579	0.1968	-0.9232	-4.8836
									-9.3478	-8.2283	-13.6291	0.1234	-0.8143	-1.0431
									-8.9196	-5.987	-16.7673	0.0427	1.1049	-0.0975
									-7.0763	-5.441	-13.3745	0.0774	0.1781
									-9.7096	-6.7972	-16.8591	-0.4942	1.3763
									-12.6858	-5.5908	-15.709	1.4381	1.6364
									-14.2243	-4.6903	-12.3655	2.2752	-0.2327
											-11.3569
											-12.8363
											-11.1225
											-7.482
											-11.8027
											-14.4221
											-10.6194
											-13.7048
											-11.0767
											-11.2986
											-9.752
											-7.6118
											-8.3467
											-7.6403
											-11.4572
											-13.3507
											-14.6761
											-12.5688
											-13.2891
											-11.5624
											-8.8178
											-13.7675
											-14.1178
											-14.6617
											-10.8942
											-11.5024
											-7.5125
											-12.6679
											-3.9122
											-3.9209
											-4.9691
											-4.3827
											-3.9858
											-5.2466
											-5.9414
											-4.5255
											-4.548
											-8.8709
											-9.8362
											-12.5689
											-4.4152
											-6.4107
											-6.1284
											-7.0887
											-7.0328
											-7.6736
											-6.2011
											-6.3391
											-5.3092
											-6.6261
											-5.8775
											-4.1262
											-6.5754
											-5.7788
											-8.9338
											-9.6775
											-6.3771
											-7.617
											-6.7322
											-9.0073
											-8.3358
											-6.9282
											-7.2116
											-9.017
											-6.2554
											-5.5427
											-6.3673
											-6.6363
											-6.5683
											-9.1046

## Sheet: Figure4
Chiral velocity for AB cell	um/min	um/min	um/min		Contractile velocity for AB cell	um/min	um/min	um/min		Mean spindle length for Rho perturbations			degrees			Mean spindle skew angles for Rho perturbations			degrees
	ect-2 (RNAi)	control	rga-3 (RNAi)			ect-2 (RNAi)	control	rga-3 (RNAi)		timepoint	event	region	Mean Spindle_length	error		timepoint	event	region	Mean Spindle_skew angle	error
Mean	-3.5755	-6.8	-8.7103			-4.76895	-4.86347	-5.15166		0	control	cortex	6.51936	0.286581		0	control	cortex
Error at 95% CI	0.576	0.412	0.588			0.43	0.4231	0.51		3	control	cortex	6.77642	0.252185		3	control	cortex
										6	control	cortex	6.66231	0.292597		6	control	cortex
	-5.439	-5.4897	-4.1456			-8.5887	-5.0802	-4.2575		9	control	cortex	7.08241	0.284116		9	control	cortex
	-3.6812	-5.6336	-5.9391			-3.6547	-5.8285	-6.2293		12	control	cortex	7.47493	0.34791		12	control	cortex
	-3.7762	-6.7901	-7.446			-4.4188	-6.062	-4.832		15	control	cortex	7.45831	0.350423		15	control	cortex
	-4.7379	-6.701	-9.3788			-3.7721	-7.8722	-5.9903		18	control	cortex	8.25543	0.35498		18	control	cortex
	-4.0559	-6.771	-8.8904			-5.7451	-9.2671	-5.4468		21	control	cortex	8.60013	0.358778		21	control	cortex
	-5.6257	-4.1877	-9.4719			-7.6605	-7.2054	-4.9315		24	control	cortex	9.31347	0.358997		24	control	cortex
	-5.6311	-4.2882	-9.6897			3.7402	-6.7162	-5.7246		27	control	cortex	9.78499	0.402691		27	control	cortex
	-4.5317	-5.1792	-8.9382			-3.6171	-4.8585	-4.4774		30	control	cortex	10.2368	0.39781		30	control	cortex
	-6.0523	-5.9338	-8.4854			-4.2923	-5.8466	-4.277		33	control	cortex	10.7088	0.443755		33	control	cortex
	-5.2153	-4.9478	-13.2187			-4.0077	-4.9615	-6.0337		36	control	cortex	11.3625	0.387911		36	control	cortex
	-4.0618	-6.1251	-11.6259			-3.4356	-4.9918	-4.9739		39	control	cortex	11.8419	0.359831		39	control	cortex
	-5.7505	-6.783	-8.0592			-3.5251	-5.0068	-4.5699		42	control	cortex	12.1661	0.332585		42	control	cortex
	-5.1325	-7.2438	-8.3147			-3.1461	-5.5081	-2.4467		45	control	cortex	12.8132	0.228005		45	control	cortex
	-3.7575	-8.0929	-8.5385			-2.3032	-8.0301	-1.5785		48	control	cortex	13.261	0.185813		48	control	cortex
	-0.0273	-5.254	1.0613			-4.1666	-2.8191	-5.6752		51	control	cortex	13.9001	0.105464		51	control	cortex
	-2.9817	-7.2814	-3.2491			-5.5145	-3.7769	-7.6383		54	control	cortex	14.32	0.0566571		54	control	cortex
	-0.325	-7.69	-3.6197			-5.9532	-2.5087	-9.2266		57	control	cortex	14.77	0.0354098		57	control	cortex	1.03e-06	5.42e-08
	-3.6759	-7.5306	-6.9796			-5.0703	-2.0152	-9.3514		60	control	cortex	15.1634	0.035371		60	control	cortex	0.90335	0.0792119
	-0.793	-8.5013	-12.4145			-5.9409	-3.1267	-11.114		63	control	cortex	15.3141	0.0257277		63	control	cortex	1.54131	0.172545
	-2.4247	-8.8567	-9.8124			-6.5131	-2.983	-9.5553		66	control	cortex	15.4919	0.016072		66	control	cortex	2.99024	0.112861
	-3.3821	-8.5901	-5.9014			-6.3516	-4.3043	-7.7001		69	control	cortex	15.878	0.0180802		69	control	cortex	4.60804	0.300856
	0.9595	-7.1009	-2.279			-2.0987	-4.5124	-3.638		72	control	cortex	16.0327	0.0281824		72	control	cortex	7.44858	0.391949
	0.4959	-7.5601	-5.4053			-8.986	-4.5351	-2.7339		75	control	cortex	16.2757	0.0327107		75	control	cortex	10.6938	0.502541
	-0.4969	-8.3498	-5.7169			-8.987	-5.3686	-3.9272		78	control	cortex	16.498	0.0330721		78	control	cortex	12.8569	0.608656
	0.7662	-9.0238	-6.765			-3.7776	-6.4984	-4.5958		81	control	cortex	16.6546	0.0294444		81	control	cortex	14.6925	0.609578
	0.408	-10.5968	-8.0161			-2.0699	-4.3434	-4.9372		84	control	cortex	16.7865	0.03209		84	control	cortex	16.2721	0.646737
	-1.5932	-9.8733	-9.7648			-1.4105	-3.9181	-6.6816		87	control	cortex	16.9078	0.0437845		87	control	cortex	19.2022	0.70104
	-2.2367	-11.458	-12.2986			0.1647	-2.0527	-7.3416		90	control	cortex	17.1457	0.0438296		90	control	cortex	20.9336	0.727036
	-6.451	-4.9196	-6.8529			-5.9947	-7.0911	-5.0992		93	control	cortex	17.3492	0.0350302		93	control	cortex	22.1678	0.724506
	-7.0379	-5.4869	-7.1844			-7.2526	-6.5149	-5.9111		96	control	cortex	17.5564	0.0406384		96	control	cortex	24.3754	0.72388
	-7.9551	-6.4615	-7.3139			-7.6062	-8.8455	-4.8612		99	control	cortex	17.6903	0.0457203		99	control	cortex	25.1636	0.725593
	-6.6243	-7.2989	-7.4188			-2.9974	-7.2144	-6.7371		102	control	cortex	17.878	0.0469561		102	control	cortex	26.1515	0.70959
	-7.0833	-6.577	-7.8937			-3.1586	-6.8857	-7.0782		105	control	cortex	18.0586	0.0485054		105	control	cortex	27.9299	0.771834
	-6.1321	-8.7349	-7.8407			-2.6478	-9.5773	-6.9382		108	control	cortex	18.179	0.0469253		108	control	cortex	29.1097	0.707887
	-4.0225	-8.3617	-7.7368			-2.7394	-4.2796	-5.8883		111	control	cortex	18.2292	0.0481758		111	control	cortex	30.1643	0.671853
	1.2735	-3.9122	-9.7887			-9.03	-4.2874	-4.029		114	control	cortex	18.41	0.0449843		114	control	cortex	31.3115	0.680596
	-0.8853	-3.9209	-9.5151			-7.1412	-2.8239	-3.6137		117	control	cortex	18.6044	0.0493441		117	control	cortex	32.1511	0.642402
	-4.1225	-4.9691	-7.2317			-5.3717	-5.1266	-4.8826		120	control	cortex	18.8194	0.0572276		120	control	cortex	32.8752	0.593521
	-0.6269	-4.3827	-7.6867			-6.1976	-4.9588	-4.974		123	control	cortex	18.8646	0.0429793		123	control	cortex	33.0275	0.592613
	-1.2797	-3.9858	-7.3209			-6.6445	-7.4018	-4.2918		126	control	cortex	18.9849	0.049272		126	control	cortex	33.2762	0.559554
	-4.6377	-5.2466	-7.0321			-5.9169	-5.8469	-4.0875		129	control	cortex	18.9671	0.0457622		129	control	cortex	33.1216	0.574209
	0.1074	-5.9414	-7.9307			-8.5125	-6.4329	-4.4474		132	control	cortex	19.2228	0.0324239		132	control	cortex	33.6356	0.589814
	-3.9271	-4.5255	-4.7658			-3.3238	-5.5778	-1.4678		135	control	cortex	19.3399	0.0385684		135	control	cortex	33.4023	0.541722
	-2.8749	-4.548	-7.1797			-4.1857	-5.0232	-2.813		138	control	cortex	19.4038	0.0307989		138	control	cortex	33.0612	0.487992
	-5.0174	-8.8709	-9.2814			-3.0755	-6.8267	-4.9012		141	control	cortex	19.5476	0.0438179		141	control	cortex	33.9096	0.456385
	-3.2756	-9.8362	-8.1256			-3.1876	-7.7156	-5.2639		144	control	cortex	19.5019	0.0330051		144	control	cortex	34.5108	0.495471
	-1.1827	-12.5689	-9.3126			-2.6878	-4.3654	-5.2909		147	control	cortex	19.6083	0.0355591		147	control	cortex	34.0614	0.41056
	-4.3026	-4.4152	-9.9864			-2.7866	-5.7141	-5.8642		150	control	cortex	19.6213	0.0262332		150	control	cortex	34.2024	0.441311
	-5.173	-6.4107	-11.4537			-3.3332	-5.1303	-6.3004		153	control	cortex	19.7127	0.0238263		153	control	cortex	34.0496	0.445864
	-3.7774	-6.1284	-5.0725			-0.7992	-4.4933	-2.5313		156	control	cortex	19.91	0.0346991		156	control	cortex	33.1065	0.411261
	-5.6364	-7.0887	-8.147			-4.6932	-4.1291	-3.113		159	control	cortex	19.8569	0.029433		159	control	cortex	32.7323	0.448883
	-4.9386	-7.0328	-11.8555			-5.3231	-5.5671	-3.3102		162	control	cortex	19.9886	0.0451374		162	control	cortex	32.974	0.496599
	-6.9423	-7.6736	-12.0997			-6.9063	-9.1156	-2.902		165	control	cortex	19.8547	0.0477573		165	control	cortex	33.343	0.468613
	-4.2367	-6.2011	-11.8006			-5.8631	-6.8398	-2.4965		168	control	cortex	19.9994	0.0506974		168	control	cortex	33.2416	0.399517
	-6.4594	-6.3391	-13.2819			-6.314	-6.2069	-2.3101		171	control	cortex	19.9533	0.0488285		171	control	cortex	33.4075	0.399497
	-6.8082	-5.3092	-14.7363			-5.2318	-6.3383	-2.9188		174	control	cortex	19.7437	0.0603155		174	control	cortex	33.3087	0.364981
	-1.3615	-6.6261	-8.1835			-7.1835	-1.4988	-7.9909		177	control	cortex	19.9075	0.050369		177	control	cortex	33.6527	0.40043
	-2.9381	-5.8775	-9.0412			-4.0543	-0.753	-7.09		180	control	cortex	19.9157	0.0599671		180	control	cortex	33.681	0.331209
	-4.9048	-4.1262	-9.55			-5.3622	-0.4095	-8.7157		183	control	cortex	19.8611	0.0550139		183	control	cortex	34.2796	0.415191
	-6.3027	-6.5754	-9.2259			-7.089	-1.3267	-7.41		186	control	cortex	19.89	0.0633071		186	control	cortex	34.2707	0.433716
	-5.8787	-5.7788	-8.7089			-4.4456	-3.188	-8.0864		189	control	cortex	19.7647	0.0700496		189	control	cortex	35.1172	0.510143
	-6.0736	-8.9338	-7.6485			-7.4297	-4.2463	-7.8292		192	control	cortex	19.7764	0.0641898		192	control	cortex	34.5941	0.519346
	-8.1852	-9.6775	-9.8297			-6.8218	-3.2249	-7.971		195	control	cortex	19.7733	0.056909		195	control	cortex	35.1096	0.504366
	-1.8286	-6.3771	-8.6474			-1.8479	-1.7096	-4.6329		198	control	cortex	19.713	0.0887549		198	control	cortex	36.0665	0.558422
	-0.7543	-7.617	-8.3418			-3.0438	-0.6907	-3.6871		201	control	cortex	19.7231	0.09218		201	control	cortex	36.0117	0.493468
	-1.6298	-6.7322	-8.5939			-3.5139	-1.0825	-4.2952		204	control	cortex	19.5628	0.105271		204	control	cortex	37.3334	0.47795
	-0.8216	-9.0073	-9.3465			-2.7043	-2.099	-4.281		207	control	cortex	19.6971	0.096843		207	control	cortex	37.4653	0.412719
	-1.402	-8.3358	-8.5314			-2.9039	-2.8898	-4.7578		210	control	cortex	19.7041	0.0839106		210	control	cortex	38.1166	0.412467
	-3.2092	-6.9282	-8.8795			-4.0615	-4.1741	-4.2568		0	ect-2(RNAi)	cortex	5.38589	0.329116		0	ect-2(RNAi)	cortex
	-2.2067	-7.2116	-8.369			-2.1968	-2.8226	-3.4256		3	ect-2(RNAi)	cortex	5.44457	0.324984		3	ect-2(RNAi)	cortex
		-9.017	-14.67			-8.5887		-2.5576		6	ect-2(RNAi)	cortex	5.67344	0.334154		6	ect-2(RNAi)	cortex
		-6.2554	-10.5363			-3.6547		-3.0809		9	ect-2(RNAi)	cortex	6.0526	0.350281		9	ect-2(RNAi)	cortex
		-5.5427	-14.829			-4.4188		-2.7379		12	ect-2(RNAi)	cortex	6.07334	0.371522		12	ect-2(RNAi)	cortex
		-6.3673	-16.1505			-3.7721		-3.8946		15	ect-2(RNAi)	cortex	6.27109	0.39372		15	ect-2(RNAi)	cortex
		-6.6363	-14.4425			-5.7451		-4.5192		18	ect-2(RNAi)	cortex	7.01573	0.363501		18	ect-2(RNAi)	cortex
		-6.5683	-11.9715			-7.6605		-5.2273		21	ect-2(RNAi)	cortex	6.98941	0.46851		21	ect-2(RNAi)	cortex
		-9.1046	-8.9438			-2.9873		-6.0226		24	ect-2(RNAi)	cortex	7.83557	0.386495		24	ect-2(RNAi)	cortex
			-16.0593					-5.8756		27	ect-2(RNAi)	cortex	8.32306	0.361083		27	ect-2(RNAi)	cortex
			-14.1176					-6.0227		30	ect-2(RNAi)	cortex	8.8186	0.402559		30	ect-2(RNAi)	cortex
			-14.2117					-6.6232		33	ect-2(RNAi)	cortex	9.35874	0.447514		33	ect-2(RNAi)	cortex
			-12.291					-6.476		36	ect-2(RNAi)	cortex	10.1568	0.450049		36	ect-2(RNAi)	cortex
			-12.1145					-7.0274		39	ect-2(RNAi)	cortex	10.7802	0.437994		39	ect-2(RNAi)	cortex
			-13.277					-7.0674		42	ect-2(RNAi)	cortex	11.7788	0.403776		42	ect-2(RNAi)	cortex
			-10.5832					-7.4218		45	ect-2(RNAi)	cortex	12.84	0.361209		45	ect-2(RNAi)	cortex
			-4.9342					-6.7475		48	ect-2(RNAi)	cortex	13.464	0.299792		48	ect-2(RNAi)	cortex
			-4.8089					-5.9947		51	ect-2(RNAi)	cortex	14.3869	0.25531		51	ect-2(RNAi)	cortex
			-5.0376					-5.4095		54	ect-2(RNAi)	cortex	15.0215	0.218501		54	ect-2(RNAi)	cortex
			-6.8919					-4.3651		57	ect-2(RNAi)	cortex	15.3783	0.218074		57	ect-2(RNAi)	cortex	3.62e-07	6.92e-08
			-6.8977					-5.1762		60	ect-2(RNAi)	cortex	15.5229	0.221315		60	ect-2(RNAi)	cortex	1.30823	0.0962315
			-8.2891					-6.2827		63	ect-2(RNAi)	cortex	15.928	0.210563		63	ect-2(RNAi)	cortex	1.20021	0.235762
			-8.3763					-6.4987		66	ect-2(RNAi)	cortex	16.2205	0.160108		66	ect-2(RNAi)	cortex	1.54663	0.194178
			-7.9355					-4.4124		69	ect-2(RNAi)	cortex	16.451	0.151414		69	ect-2(RNAi)	cortex	2.24728	0.245414
			-5.1626					-2.6152		72	ect-2(RNAi)	cortex	16.589	0.141814		72	ect-2(RNAi)	cortex	2.69296	0.196549
			-5.1651					-0.4129		75	ect-2(RNAi)	cortex	16.8122	0.133511		75	ect-2(RNAi)	cortex	3.49122	0.204571
			-4.7699					-9.2371		78	ect-2(RNAi)	cortex	17.0843	0.104169		78	ect-2(RNAi)	cortex	3.87051	0.215873
			-3.4553					-11.9088		81	ect-2(RNAi)	cortex	17.2551	0.103883		81	ect-2(RNAi)	cortex	4.25806	0.254782
			-4.8726					-12.0388		84	ect-2(RNAi)	cortex	17.4272	0.101438		84	ect-2(RNAi)	cortex	4.73668	0.333703
			-1.3469					-9.1529		87	ect-2(RNAi)	cortex	17.5829	0.0965799		87	ect-2(RNAi)	cortex	5.21671	0.366293
			-7.1331					-11.4001		90	ect-2(RNAi)	cortex	17.7403	0.0920756		90	ect-2(RNAi)	cortex	5.89711	0.382406
			-7.1131					-8.9713		93	ect-2(RNAi)	cortex	17.8773	0.0866152		93	ect-2(RNAi)	cortex	6.71464	0.444435
			-8.8321					-8.4514		96	ect-2(RNAi)	cortex	17.9795	0.086266		96	ect-2(RNAi)	cortex	7.41383	0.488271
			-9.0914					-7.5884		99	ect-2(RNAi)	cortex	18.098	0.0874462		99	ect-2(RNAi)	cortex	8.0085	0.582694
			-6.7015					-7.2839		102	ect-2(RNAi)	cortex	18.2271	0.0806474		102	ect-2(RNAi)	cortex	9.05263	0.654158
			-7.6032					-6.5996		105	ect-2(RNAi)	cortex	18.3492	0.083493		105	ect-2(RNAi)	cortex	9.89239	0.689447
			-8.6274					-6.5084		108	ect-2(RNAi)	cortex	18.4836	0.0879779		108	ect-2(RNAi)	cortex	10.6621	0.705647
			-13.2887					-2.6221		111	ect-2(RNAi)	cortex	18.5964	0.0843946		111	ect-2(RNAi)	cortex	11.4085	0.707853
			-12.9169					-4.5349		114	ect-2(RNAi)	cortex	18.6882	0.0827004		114	ect-2(RNAi)	cortex	12.1337	0.722096
			-14.2384					-1.532		117	ect-2(RNAi)	cortex	18.7808	0.0839477		117	ect-2(RNAi)	cortex	12.9693	0.793146
			-7.4817					-1.9237		120	ect-2(RNAi)	cortex	18.908	0.0837983		120	ect-2(RNAi)	cortex	14.0278	0.869945
			-9.4269					0.1069		123	ect-2(RNAi)	cortex	19.0532	0.0840591		123	ect-2(RNAi)	cortex	14.6335	0.913495
			-6.7387					-5.958		126	ect-2(RNAi)	cortex	19.1573	0.0871092		126	ect-2(RNAi)	cortex	15.4851	0.972193
			-12.1708					-3.4964		129	ect-2(RNAi)	cortex	19.2644	0.0860069		129	ect-2(RNAi)	cortex	16.475	1.03968
										132	ect-2(RNAi)	cortex	19.3851	0.0850996		132	ect-2(RNAi)	cortex	17.6179	1.09227
										135	ect-2(RNAi)	cortex	19.4569	0.0859743		135	ect-2(RNAi)	cortex	18.4129	1.09633
										138	ect-2(RNAi)	cortex	19.545	0.087955		138	ect-2(RNAi)	cortex	19.3031	1.10693
										141	ect-2(RNAi)	cortex	19.6279	0.0893603		141	ect-2(RNAi)	cortex	20.1661	1.14227
										144	ect-2(RNAi)	cortex	19.7236	0.0915749		144	ect-2(RNAi)	cortex	20.9995	1.14515
										147	ect-2(RNAi)	cortex	19.8247	0.0883033		147	ect-2(RNAi)	cortex	21.9608	1.19988
										150	ect-2(RNAi)	cortex	19.9096	0.0888065		150	ect-2(RNAi)	cortex	23.1959	1.22591
										153	ect-2(RNAi)	cortex	19.9809	0.0861663		153	ect-2(RNAi)	cortex	24.27	1.23616
										156	ect-2(RNAi)	cortex	20.0459	0.0852282		156	ect-2(RNAi)	cortex	25.1692	1.25052
										159	ect-2(RNAi)	cortex	20.1139	0.0877402		159	ect-2(RNAi)	cortex	25.8021	1.2649
										162	ect-2(RNAi)	cortex	20.1345	0.0823723		162	ect-2(RNAi)	cortex	26.5532	1.29373
										165	ect-2(RNAi)	cortex	20.1851	0.0828762		165	ect-2(RNAi)	cortex	27.2574	1.31853
										168	ect-2(RNAi)	cortex	20.2219	0.0840358		168	ect-2(RNAi)	cortex	28.0926	1.36502
										171	ect-2(RNAi)	cortex	20.2497	0.0849787		171	ect-2(RNAi)	cortex	28.9801	1.36821
										174	ect-2(RNAi)	cortex	20.3188	0.0888199		174	ect-2(RNAi)	cortex	29.9441	1.35475
										177	ect-2(RNAi)	cortex	20.358	0.0801027		177	ect-2(RNAi)	cortex	30.4482	1.35655
										180	ect-2(RNAi)	cortex	20.4329	0.0833783		180	ect-2(RNAi)	cortex	30.9637	1.3555
										183	ect-2(RNAi)	cortex	20.446	0.0879414		183	ect-2(RNAi)	cortex	31.4637	1.32385
										186	ect-2(RNAi)	cortex	20.4869	0.0865698		186	ect-2(RNAi)	cortex	32.0584	1.32084
										189	ect-2(RNAi)	cortex	20.6171	0.090793		189	ect-2(RNAi)	cortex	32.8516	1.37748
										192	ect-2(RNAi)	cortex	20.6451	0.0922459		192	ect-2(RNAi)	cortex	33.111	1.35896
										195	ect-2(RNAi)	cortex	20.6978	0.0966527		195	ect-2(RNAi)	cortex	33.8022	1.34398
										198	ect-2(RNAi)	cortex	20.7829	0.0973686		198	ect-2(RNAi)	cortex	34.3761	1.35968
										201	ect-2(RNAi)	cortex	20.8641	0.102501		201	ect-2(RNAi)	cortex	34.852	1.3323
										204	ect-2(RNAi)	cortex	20.869	0.112864		204	ect-2(RNAi)	cortex	35.4773	1.31002
										207	ect-2(RNAi)	cortex	20.9464	0.120888		207	ect-2(RNAi)	cortex	36.3571	1.29069
										210	ect-2(RNAi)	cortex	21.0076	0.122549		210	ect-2(RNAi)	cortex	36.2556	1.28007
										0	rga-3(RNAi)	cortex	6.62899	0.321733		0	rga-3(RNAi)	cortex
										3	rga-3(RNAi)	cortex	6.85129	0.324367		3	rga-3(RNAi)	cortex
										6	rga-3(RNAi)	cortex	6.84003	0.32616		6	rga-3(RNAi)	cortex
										9	rga-3(RNAi)	cortex	7.05763	0.340116		9	rga-3(RNAi)	cortex
										12	rga-3(RNAi)	cortex	7.14218	0.353158		12	rga-3(RNAi)	cortex
										15	rga-3(RNAi)	cortex	7.43193	0.402424		15	rga-3(RNAi)	cortex
										18	rga-3(RNAi)	cortex	7.78758	0.423408		18	rga-3(RNAi)	cortex
										21	rga-3(RNAi)	cortex	8.40646	0.449033		21	rga-3(RNAi)	cortex
										24	rga-3(RNAi)	cortex	8.46926	0.419346		24	rga-3(RNAi)	cortex
										27	rga-3(RNAi)	cortex	8.71067	0.427353		27	rga-3(RNAi)	cortex
										30	rga-3(RNAi)	cortex	9.10361	0.439579		30	rga-3(RNAi)	cortex
										33	rga-3(RNAi)	cortex	9.56876	0.445374		33	rga-3(RNAi)	cortex
										36	rga-3(RNAi)	cortex	10.2042	0.461456		36	rga-3(RNAi)	cortex
										39	rga-3(RNAi)	cortex	10.9835	0.441266		39	rga-3(RNAi)	cortex
										42	rga-3(RNAi)	cortex	11.526	0.415798		42	rga-3(RNAi)	cortex
										45	rga-3(RNAi)	cortex	12.6901	0.351339		45	rga-3(RNAi)	cortex
										48	rga-3(RNAi)	cortex	13.5781	0.321251		48	rga-3(RNAi)	cortex
										51	rga-3(RNAi)	cortex	14.2697	0.257789		51	rga-3(RNAi)	cortex
										54	rga-3(RNAi)	cortex	14.8872	0.180459		54	rga-3(RNAi)	cortex
										57	rga-3(RNAi)	cortex	15.2191	0.170471		57	rga-3(RNAi)	cortex	7.04e-07	7.38e-08
										60	rga-3(RNAi)	cortex	15.6062	0.150946		60	rga-3(RNAi)	cortex	1.43468	0.107122
										63	rga-3(RNAi)	cortex	15.923	0.150455		63	rga-3(RNAi)	cortex	1.42801	0.146727
										66	rga-3(RNAi)	cortex	16.3699	0.126786		66	rga-3(RNAi)	cortex	2.98567	0.265372
										69	rga-3(RNAi)	cortex	16.543	0.129788		69	rga-3(RNAi)	cortex	5.39313	0.445796
										72	rga-3(RNAi)	cortex	16.8315	0.129848		72	rga-3(RNAi)	cortex	8.21775	0.628048
										75	rga-3(RNAi)	cortex	17.0574	0.13215		75	rga-3(RNAi)	cortex	11.0905	0.736777
										78	rga-3(RNAi)	cortex	17.2968	0.131406		78	rga-3(RNAi)	cortex	14.0097	0.868017
										81	rga-3(RNAi)	cortex	17.4787	0.129924		81	rga-3(RNAi)	cortex	17.0165	0.893389
										84	rga-3(RNAi)	cortex	17.6026	0.143301		84	rga-3(RNAi)	cortex	19.6528	0.849863
										87	rga-3(RNAi)	cortex	17.8431	0.145858		87	rga-3(RNAi)	cortex	22.2176	0.808813
										90	rga-3(RNAi)	cortex	18.0731	0.138505		90	rga-3(RNAi)	cortex	24.5624	0.809039
										93	rga-3(RNAi)	cortex	18.2498	0.13403		93	rga-3(RNAi)	cortex	26.5873	0.794988
										96	rga-3(RNAi)	cortex	18.4504	0.126804		96	rga-3(RNAi)	cortex	28.4155	0.752457
										99	rga-3(RNAi)	cortex	18.6114	0.129179		99	rga-3(RNAi)	cortex	29.9054	0.688557
										102	rga-3(RNAi)	cortex	18.7927	0.125497		102	rga-3(RNAi)	cortex	31.1377	0.665097
										105	rga-3(RNAi)	cortex	18.9121	0.125575		105	rga-3(RNAi)	cortex	32.6263	0.648658
										108	rga-3(RNAi)	cortex	19.0821	0.126308		108	rga-3(RNAi)	cortex	33.591	0.641685
										111	rga-3(RNAi)	cortex	19.1529	0.124943		111	rga-3(RNAi)	cortex	34.1893	0.66048
										114	rga-3(RNAi)	cortex	19.2893	0.12496		114	rga-3(RNAi)	cortex	34.8673	0.677539
										117	rga-3(RNAi)	cortex	19.3808	0.124335		117	rga-3(RNAi)	cortex	35.3885	0.693523
										120	rga-3(RNAi)	cortex	19.5055	0.121077		120	rga-3(RNAi)	cortex	35.7958	0.686817
										123	rga-3(RNAi)	cortex	19.562	0.112448		123	rga-3(RNAi)	cortex	36.1659	0.694003
										126	rga-3(RNAi)	cortex	19.6931	0.119308		126	rga-3(RNAi)	cortex	36.0985	0.7363
										129	rga-3(RNAi)	cortex	19.7534	0.112079		129	rga-3(RNAi)	cortex	36.3807	0.739809
										132	rga-3(RNAi)	cortex	19.7976	0.107079		132	rga-3(RNAi)	cortex	36.7151	0.735055
										135	rga-3(RNAi)	cortex	19.8405	0.103306		135	rga-3(RNAi)	cortex	36.6706	0.77152
										138	rga-3(RNAi)	cortex	19.8326	0.106076		138	rga-3(RNAi)	cortex	36.4404	0.846965
										141	rga-3(RNAi)	cortex	19.8518	0.106648		141	rga-3(RNAi)	cortex	36.2434	0.885782
										144	rga-3(RNAi)	cortex	19.8976	0.102997		144	rga-3(RNAi)	cortex	35.4194	0.928049
										147	rga-3(RNAi)	cortex	19.8765	0.10443		147	rga-3(RNAi)	cortex	34.942	0.94697
										150	rga-3(RNAi)	cortex	19.8811	0.107255		150	rga-3(RNAi)	cortex	34.3614	0.992624
										153	rga-3(RNAi)	cortex	19.8784	0.107739		153	rga-3(RNAi)	cortex	33.7038	1.04927
										156	rga-3(RNAi)	cortex	19.8929	0.105974		156	rga-3(RNAi)	cortex	33.5827	1.10534
										159	rga-3(RNAi)	cortex	19.9285	0.108192		159	rga-3(RNAi)	cortex	33.3654	1.18402
										162	rga-3(RNAi)	cortex	19.938	0.106872		162	rga-3(RNAi)	cortex	33.1387	1.30089
										165	rga-3(RNAi)	cortex	19.9866	0.114584		165	rga-3(RNAi)	cortex	33.0185	1.33526
										168	rga-3(RNAi)	cortex	20.0233	0.110989		168	rga-3(RNAi)	cortex	32.7172	1.36934
										171	rga-3(RNAi)	cortex	20.0246	0.112958		171	rga-3(RNAi)	cortex	32.4259	1.38867
										174	rga-3(RNAi)	cortex	19.9632	0.116592		174	rga-3(RNAi)	cortex	32.2123	1.4155
										177	rga-3(RNAi)	cortex	19.9758	0.11347		177	rga-3(RNAi)	cortex	31.5756	1.47342
										180	rga-3(RNAi)	cortex	19.8555	0.12289		180	rga-3(RNAi)	cortex	31.2761	1.49392
										183	rga-3(RNAi)	cortex	19.7501	0.131277		183	rga-3(RNAi)	cortex	30.9421	1.53745
										186	rga-3(RNAi)	cortex	19.6777	0.143067		186	rga-3(RNAi)	cortex	30.5149	1.58152
										189	rga-3(RNAi)	cortex	19.6188	0.150022		189	rga-3(RNAi)	cortex	29.9796	1.65175
										192	rga-3(RNAi)	cortex	19.5464	0.152037		192	rga-3(RNAi)	cortex	29.7077	1.61349
										195	rga-3(RNAi)	cortex	19.4789	0.148687		195	rga-3(RNAi)	cortex	29.5486	1.56469
										198	rga-3(RNAi)	cortex	19.3769	0.151769		198	rga-3(RNAi)	cortex	29.449	1.52957
										201	rga-3(RNAi)	cortex	19.1913	0.13588		201	rga-3(RNAi)	cortex	27.8699	1.38366
										204	rga-3(RNAi)	cortex	19.2329	0.140743		204	rga-3(RNAi)	cortex	27.9426	1.3445
										207	rga-3(RNAi)	cortex	19.2566	0.136681		207	rga-3(RNAi)	cortex	28.1462	1.28543
										210	rga-3(RNAi)	cortex	19.2581	0.128574		210	rga-3(RNAi)	cortex	28.47	1.2528

## Sheet: Figure5
															Spindle length during the AB cell division			(um)						(um)			Spindle skew angle during the AB cell division			(degrees)						(degrees)
		Spindle skew in NMY(ts) embryos (degrees)													timepoint	event	region	Mean Spindle_length	SEM		timepoint	event	region	Mean Spindle_length	SEM		timepoint	event	region	Mean Angle	SEM		timepoint	event	region	Mean Angle	SEM
	P0	AB	P1	Aba	Abp	EMS	P2	ABaL	ABaR	ABpL	ABpR				3	control	cortex	4.97609	0.222873		3	NMY(ts)	cortex	7.22832	0.438167		3	control	cortex				3	NMY(ts)	cortex
															6	control	cortex	4.80982	0.247868		6	NMY(ts)	cortex	7.87177	0.368418		6	control	cortex				6	NMY(ts)	cortex
Mean	2.717	10.6284	2.5044	4.5886	6.5656	1.597	6.6234	1.3074	1.783	1.5952	1.0414				9	control	cortex	5.23122	0.183634		9	NMY(ts)	cortex	8.05714	0.33348		9	control	cortex				9	NMY(ts)	cortex
															12	control	cortex	5.51738	0.159307		12	NMY(ts)	cortex	8.07611	0.330038		12	control	cortex				12	NMY(ts)	cortex
embryo 1	1.637	8.846	1.347	6.836	9.035	0.725	7.936	2.183	1.384	0.819	1.281				15	control	cortex	5.77312	0.182065		15	NMY(ts)	cortex	8.28784	0.327		15	control	cortex				15	NMY(ts)	cortex
embryo 2	3.946	7.283	2.485	6.153	8.534	1.273	3.846	1.182	0.749	0.917	0.947				18	control	cortex	5.98221	0.191815		18	NMY(ts)	cortex	9.1008	0.267324		18	control	cortex				18	NMY(ts)	cortex
embryo 3	0.8	14.875	1.783	3.745	8.365	2.846	5.215	0.475	1.18	3.921	1.263				21	control	cortex	6.35111	0.191397		21	NMY(ts)	cortex	9.66929	0.268859		21	control	cortex				21	NMY(ts)	cortex
embryo 4	0.363	12.019	1.945	1.374	3.173	1.274	6.273	0.749	1.973	1.067	0.786				24	control	cortex	6.64443	0.208861		24	NMY(ts)	cortex	10.1348	0.286809		24	control	cortex				24	NMY(ts)	cortex
embryo 5	6.839	10.119	4.962	4.835	3.721	1.867	9.847	1.948	3.629	1.252	0.93				27	control	cortex	7.32015	0.268641		27	NMY(ts)	cortex	10.548	0.240344		27	control	cortex				27	NMY(ts)	cortex
															30	control	cortex	7.55704	0.370077		30	NMY(ts)	cortex	11.0271	0.230637		30	control	cortex				30	NMY(ts)	cortex
															33	control	cortex	8.50967	0.393265		33	NMY(ts)	cortex	11.7487	0.196503		33	control	cortex				33	NMY(ts)	cortex
															36	control	cortex	9.50355	0.327256		36	NMY(ts)	cortex	12.0015	0.207371		36	control	cortex				36	NMY(ts)	cortex
		Spindle skew in control embryos (degrees)													39	control	cortex	10.4969	0.301229		39	NMY(ts)	cortex	12.3023	0.218583		39	control	cortex				39	NMY(ts)	cortex
	P0	AB	P1	Aba	Abp	P2	EMS	ABaL	ABaR	ABpL	ABpR				42	control	cortex	11.4626	0.296361		42	NMY(ts)	cortex	12.985	0.180374		42	control	cortex				42	NMY(ts)	cortex
															45	control	cortex	12.3718	0.293558		45	NMY(ts)	cortex	13.3296	0.2074		45	control	cortex				45	NMY(ts)	cortex
Mean	2.6188	36.969	2.3764	27.6402	23.5518	2.6298	4.274	17.7754	15.1854	10.0116	15.7794				48	control	cortex	13.4172	0.289145		48	NMY(ts)	cortex	13.7302	0.19657		48	control	cortex				48	NMY(ts)	cortex
															51	control	cortex	14.3925	0.254313		51	NMY(ts)	cortex	14.1199	0.190154		51	control	cortex				51	NMY(ts)	cortex
embryo 1	1.047	37.974	2.968	24.329	22.184	4.19	3.158	16.473	10.3	10.274	15.27				54	control	cortex	15.1191	0.213366		54	NMY(ts)	cortex	14.6041	0.193607		54	control	cortex				54	NMY(ts)	cortex
embryo 2	1.456	37.62	1.964	29.562	25.164	1.015	5.037	16.794	14.054	9.264	18.853				57	control	cortex	15.5319	0.193738		57	NMY(ts)	cortex	14.6863	0.181925		57	control	cortex				57	NMY(ts)	cortex
embryo 3	4.296	35.92	2.046	27.974	22.957	1.953	2.035	15.793	20.853	8.195	14.673				60	control	cortex	15.9223	0.193095		60	NMY(ts)	cortex	15.2029	0.19071		60	control	cortex	0.0658161	0.0518895		60	NMY(ts)	cortex	0.0538279	0.180113
embryo 4	3.935	39.284	1.849	26.462	23.952	3.489	4.936	19.783	14.673	12.38	16.047				63	control	cortex	16.1418	0.203018		63	NMY(ts)	cortex	15.4332	0.178056		63	control	cortex	2.36528	0.709209		63	NMY(ts)	cortex	0.478655	0.179636
embryo 5	2.36	34.047	3.055	29.874	23.502	2.502	6.204	20.034	16.047	9.945	14.054				66	control	cortex	16.4763	0.205018		66	NMY(ts)	cortex	15.3939	0.155787		66	control	cortex	5.34732	0.736173		66	NMY(ts)	cortex	1.3912	0.0910163
embryo 6	0.782	40.213	1.672	27.649	26.153	2.845	4.845	17.538	17.184	12.527	13.629				69	control	cortex	16.8103	0.198588		69	NMY(ts)	cortex	15.7101	0.172836		69	control	cortex	8.36804	0.827687		69	NMY(ts)	cortex	1.64733	0.172553
															72	control	cortex	17.0215	0.193729		72	NMY(ts)	cortex	15.8957	0.160698		72	control	cortex	10.0103	0.94892		72	NMY(ts)	cortex	1.52947	0.171657
															75	control	cortex	17.1564	0.205331		75	NMY(ts)	cortex	16.0195	0.148734		75	control	cortex	12.029	1.1153		75	NMY(ts)	cortex	2.04913	0.275789
															78	control	cortex	17.4917	0.209072		78	NMY(ts)	cortex	16.3687	0.154115		78	control	cortex	14.0776	1.18104		78	NMY(ts)	cortex	1.94536	0.311245
															81	control	cortex	17.7525	0.204627		81	NMY(ts)	cortex	16.5303	0.163982		81	control	cortex	15.719	1.26401		81	NMY(ts)	cortex	1.84869	0.330416
															84	control	cortex	18.044	0.18927		84	NMY(ts)	cortex	16.591	0.160769		84	control	cortex	17.6832	1.3428		84	NMY(ts)	cortex	2.10523	0.293475
															87	control	cortex	18.1922	0.202132		87	NMY(ts)	cortex	16.7626	0.17214		87	control	cortex	20.1565	1.39338		87	NMY(ts)	cortex	2.28105	0.315762
															90	control	cortex	18.3915	0.198346		90	NMY(ts)	cortex	16.8114	0.176849		90	control	cortex	22.637	1.47345		90	NMY(ts)	cortex	2.13432	0.346397
															93	control	cortex	18.5901	0.20106		93	NMY(ts)	cortex	16.9704	0.174895		93	control	cortex	24.246	1.59921		93	NMY(ts)	cortex	2.30906	0.288161
															96	control	cortex	18.8317	0.198235		96	NMY(ts)	cortex	17.0426	0.171401		96	control	cortex	25.9379	1.69923		96	NMY(ts)	cortex	2.13159	0.294994
															99	control	cortex	19.0105	0.202021		99	NMY(ts)	cortex	17.3946	0.171457		99	control	cortex	27.1249	1.83814		99	NMY(ts)	cortex	2.31423	0.245935
															102	control	cortex	19.2546	0.198513		102	NMY(ts)	cortex	17.5631	0.167478		102	control	cortex	28.3756	1.90704		102	NMY(ts)	cortex	2.16906	0.264393
															105	control	cortex	19.4306	0.195273		105	NMY(ts)	cortex	17.6637	0.171637		105	control	cortex	30.1593	1.92153		105	NMY(ts)	cortex	2.2971	0.206241
															108	control	cortex	19.5925	0.19572		108	NMY(ts)	cortex	17.9562	0.183983		108	control	cortex	31.7454	1.86411		108	NMY(ts)	cortex	2.63619	0.200941
															111	control	cortex	19.7236	0.190719		111	NMY(ts)	cortex	18.1617	0.186063		111	control	cortex	33.1517	1.83362		111	NMY(ts)	cortex	2.49725	0.167764
															114	control	cortex	19.8879	0.191682		114	NMY(ts)	cortex	18.3769	0.180844		114	control	cortex	34.7619	1.72532		114	NMY(ts)	cortex	2.51628	0.139438
															117	control	cortex	20.0453	0.188631		117	NMY(ts)	cortex	18.5404	0.179321		117	control	cortex	36.4953	1.55646		117	NMY(ts)	cortex	2.75785	0.0919284
															120	control	cortex	20.2403	0.179544		120	NMY(ts)	cortex	18.8103	0.191889		120	control	cortex	37.2386	1.45989		120	NMY(ts)	cortex	2.46077	0.174554
															123	control	cortex	20.313	0.179151		123	NMY(ts)	cortex	18.9469	0.193845		123	control	cortex	37.8196	1.36408		123	NMY(ts)	cortex	2.42422	0.158852
															126	control	cortex	20.4247	0.169392		126	NMY(ts)	cortex	19.1407	0.192333		126	control	cortex	38.1191	1.31747		126	NMY(ts)	cortex	3.15409	0.240392
															129	control	cortex	20.5112	0.168257		129	NMY(ts)	cortex	19.4265	0.181183		129	control	cortex	38.6498	1.33233		129	NMY(ts)	cortex	3.02647	0.228725
															132	control	cortex	20.635	0.162497		132	NMY(ts)	cortex	19.4396	0.176589		132	control	cortex	39.3448	1.29365		132	NMY(ts)	cortex	3.26052	0.166759
															135	control	cortex	20.737	0.156804		135	NMY(ts)	cortex	19.7015	0.21082		135	control	cortex	39.9817	1.20351		135	NMY(ts)	cortex	3.82306	0.209812
															138	control	cortex	20.778	0.156175		138	NMY(ts)	cortex	19.7158	0.182695		138	control	cortex	40.6927	1.0994		138	NMY(ts)	cortex	3.40579	0.186424
															141	control	cortex	20.861	0.143926		141	NMY(ts)	cortex	19.8697	0.185884		141	control	cortex	40.701	1.02449		141	NMY(ts)	cortex	3.27166	0.222469
															144	control	cortex	20.8842	0.137461		144	NMY(ts)	cortex	20.0531	0.204617		144	control	cortex	40.7245	0.967984		144	NMY(ts)	cortex	3.39921	0.194837
															147	control	cortex	20.922	0.125077		147	NMY(ts)	cortex	20.0494	0.199027		147	control	cortex	40.7769	0.94013		147	NMY(ts)	cortex	3.54253	0.212125
															150	control	cortex	20.9465	0.124022		150	NMY(ts)	cortex	20.0754	0.179693		150	control	cortex	40.7669	0.881183		150	NMY(ts)	cortex	3.33412	0.217675
															153	control	cortex	21.0563	0.114537		153	NMY(ts)	cortex	20.2426	0.2025		153	control	cortex	41.1838	0.887487		153	NMY(ts)	cortex	3.79837	0.231921
															156	control	cortex	21.1226	0.11261		156	NMY(ts)	cortex	20.2659	0.19596		156	control	cortex	41.3749	0.855827		156	NMY(ts)	cortex	3.71952	0.234687
															159	control	cortex	21.1682	0.111249		159	NMY(ts)	cortex	20.314	0.192821		159	control	cortex	41.6868	0.821523		159	NMY(ts)	cortex	4.33643	0.22761
															162	control	cortex	21.227	0.115616		162	NMY(ts)	cortex	20.4418	0.193969		162	control	cortex	42.0712	0.815657		162	NMY(ts)	cortex	4.2692	0.221584
															165	control	cortex	21.2448	0.110342		165	NMY(ts)	cortex	20.5869	0.20005		165	control	cortex	42.1893	0.777419		165	NMY(ts)	cortex	3.87321	0.274041
															168	control	cortex	21.2937	0.0953885		168	NMY(ts)	cortex	20.7217	0.20988		168	control	cortex	42.4368	0.758211		168	NMY(ts)	cortex	4.35022	0.278799
															171	control	cortex	21.3234	0.0917221		171	NMY(ts)	cortex	20.7691	0.212758		171	control	cortex	42.6692	0.758324		171	NMY(ts)	cortex	4.67699	0.277697
															174	control	cortex	21.3902	0.0931753		174	NMY(ts)	cortex	21.1026	0.201221		174	control	cortex	42.9724	0.76431		174	NMY(ts)	cortex	4.2359	0.263547
															177	control	cortex	21.4693	0.0900993		177	NMY(ts)	cortex	21.3065	0.217819		177	control	cortex	43.368	0.668692		177	NMY(ts)	cortex	4.59064	0.294853
															180	control	cortex	21.4958	0.0931258		180	NMY(ts)	cortex	21.4216	0.211135		180	control	cortex	43.5915	0.641916		180	NMY(ts)	cortex	5.26522	0.274632
															183	control	cortex	21.5258	0.0849689		183	NMY(ts)	cortex	21.4487	0.205343		183	control	cortex	43.5184	0.57036		183	NMY(ts)	cortex	4.79127	0.316684
															186	control	cortex	21.5607	0.0775225		186	NMY(ts)	cortex	21.5578	0.212458		186	control	cortex	43.7341	0.531443		186	NMY(ts)	cortex	4.92456	0.260206
															189	control	cortex	21.6133	0.0770905		189	NMY(ts)	cortex	21.6181	0.191258		189	control	cortex	43.8334	0.533667		189	NMY(ts)	cortex	4.60768	0.325176
															192	control	cortex	21.5977	0.0826877		192	NMY(ts)	cortex	21.7299	0.188526		192	control	cortex	43.5202	0.538653		192	NMY(ts)	cortex	5.03976	0.284425
															195	control	cortex	21.7456	0.0801951		195	NMY(ts)	cortex	22.0364	0.188096		195	control	cortex	43.983	0.504919		195	NMY(ts)	cortex	5.04175	0.28126
															198	control	cortex	21.7375	0.100803		198	NMY(ts)	cortex	21.9704	0.172693		198	control	cortex	44.6267	0.512886		198	NMY(ts)	cortex	4.96047	0.284456
															201	control	cortex	21.7389	0.113684		201	NMY(ts)	cortex	22.338	0.184181		201	control	cortex	45.5064	0.520864		201	NMY(ts)	cortex	5.53558	0.267286
															204	control	cortex	21.7536	0.107724		204	NMY(ts)	cortex	22.4887	0.190704		204	control	cortex	45.7619	0.492766		204	NMY(ts)	cortex	6.28554	0.237878
															207	control	cortex	21.7618	0.110383		207	NMY(ts)	cortex	22.7331	0.192582		207	control	cortex	46.0064	0.521384		207	NMY(ts)	cortex	6.17532	0.287012
															210	control	cortex	21.8877	0.108742		210	NMY(ts)	cortex	22.9423	0.209667		210	control	cortex	46.0576	0.573169		210	NMY(ts)	cortex	6.5408	0.25272
															213	control	cortex	21.9821	0.104167		213	NMY(ts)	cortex	23.0317	0.210324		213	control	cortex	46.2121	0.60117		213	NMY(ts)	cortex	6.96462	0.32606
															3	NMY(ts)	cortex	7.22832	0.438167
															6	NMY(ts)	cortex	7.87177	0.368418
															9	NMY(ts)	cortex	8.05714	0.33348
															12	NMY(ts)	cortex	8.07611	0.330038
															15	NMY(ts)	cortex	8.28784	0.327
															18	NMY(ts)	cortex	9.1008	0.267324
															21	NMY(ts)	cortex	9.66929	0.268859
															24	NMY(ts)	cortex	10.1348	0.286809
															27	NMY(ts)	cortex	10.548	0.240344
															30	NMY(ts)	cortex	11.0271	0.230637
															33	NMY(ts)	cortex	11.7487	0.196503
															36	NMY(ts)	cortex	12.0015	0.207371
															39	NMY(ts)	cortex	12.3023	0.218583
															42	NMY(ts)	cortex	12.985	0.180374
															45	NMY(ts)	cortex	13.3296	0.2074
															48	NMY(ts)	cortex	13.7302	0.19657
															51	NMY(ts)	cortex	14.1199	0.190154
															54	NMY(ts)	cortex	14.6041	0.193607
															57	NMY(ts)	cortex	14.6863	0.181925
															60	NMY(ts)	cortex	15.2029	0.19071
															63	NMY(ts)	cortex	15.4332	0.178056
															66	NMY(ts)	cortex	15.3939	0.155787
															69	NMY(ts)	cortex	15.7101	0.172836
															72	NMY(ts)	cortex	15.8957	0.160698
															75	NMY(ts)	cortex	16.0195	0.148734
															78	NMY(ts)	cortex	16.3687	0.154115
															81	NMY(ts)	cortex	16.5303	0.163982
															84	NMY(ts)	cortex	16.591	0.160769
															87	NMY(ts)	cortex	16.7626	0.17214
															90	NMY(ts)	cortex	16.8114	0.176849
															93	NMY(ts)	cortex	16.9704	0.174895
															96	NMY(ts)	cortex	17.0426	0.171401
															99	NMY(ts)	cortex	17.3946	0.171457
															102	NMY(ts)	cortex	17.5631	0.167478
															105	NMY(ts)	cortex	17.6637	0.171637
															108	NMY(ts)	cortex	17.9562	0.183983
															111	NMY(ts)	cortex	18.1617	0.186063
															114	NMY(ts)	cortex	18.3769	0.180844
															117	NMY(ts)	cortex	18.5404	0.179321
															120	NMY(ts)	cortex	18.8103	0.191889
															123	NMY(ts)	cortex	18.9469	0.193845
															126	NMY(ts)	cortex	19.1407	0.192333
															129	NMY(ts)	cortex	19.4265	0.181183
															132	NMY(ts)	cortex	19.4396	0.176589
															135	NMY(ts)	cortex	19.7015	0.21082
															138	NMY(ts)	cortex	19.7158	0.182695
															141	NMY(ts)	cortex	19.8697	0.185884
															144	NMY(ts)	cortex	20.0531	0.204617
															147	NMY(ts)	cortex	20.0494	0.199027
															150	NMY(ts)	cortex	20.0754	0.179693
															153	NMY(ts)	cortex	20.2426	0.2025
															156	NMY(ts)	cortex	20.2659	0.19596
															159	NMY(ts)	cortex	20.314	0.192821
															162	NMY(ts)	cortex	20.4418	0.193969
															165	NMY(ts)	cortex	20.5869	0.20005
															168	NMY(ts)	cortex	20.7217	0.20988
															171	NMY(ts)	cortex	20.7691	0.212758
															174	NMY(ts)	cortex	21.1026	0.201221
															177	NMY(ts)	cortex	21.3065	0.217819
															180	NMY(ts)	cortex	21.4216	0.211135
															183	NMY(ts)	cortex	21.4487	0.205343
															186	NMY(ts)	cortex	21.5578	0.212458
															189	NMY(ts)	cortex	21.6181	0.191258
															192	NMY(ts)	cortex	21.7299	0.188526
															195	NMY(ts)	cortex	22.0364	0.188096
															198	NMY(ts)	cortex	21.9704	0.172693
															201	NMY(ts)	cortex	22.338	0.184181
															204	NMY(ts)	cortex	22.4887	0.190704
															207	NMY(ts)	cortex	22.7331	0.192582
															210	NMY(ts)	cortex	22.9423	0.209667
															213	NMY(ts)	cortex	23.0317	0.210324
