# Supplementary figures and images for: Cell lineage-dependent chiral actomyosin flows drive cellular rearrangements in early Caenorhabditis elegans development
Source: eLife journal article supplement (doi:10.7554/elife.54930), 2020-07-09

**A**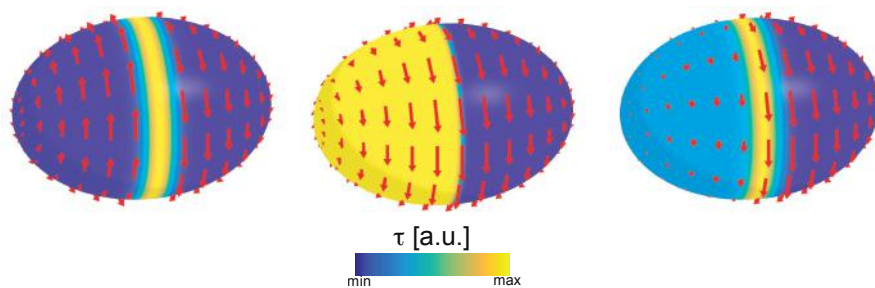**B**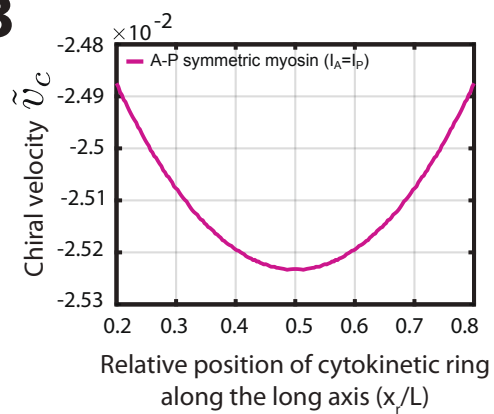**C**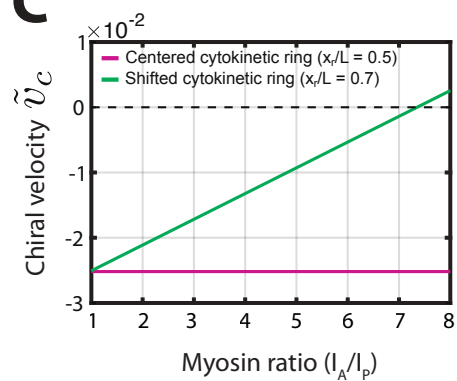**D**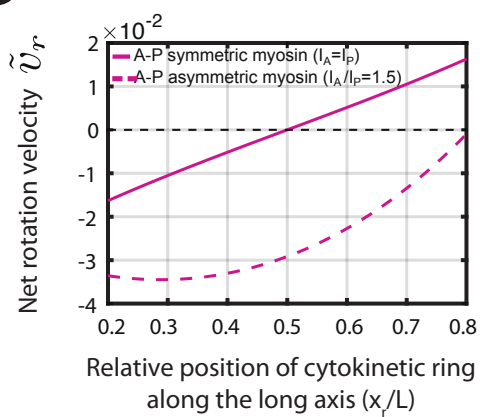**E**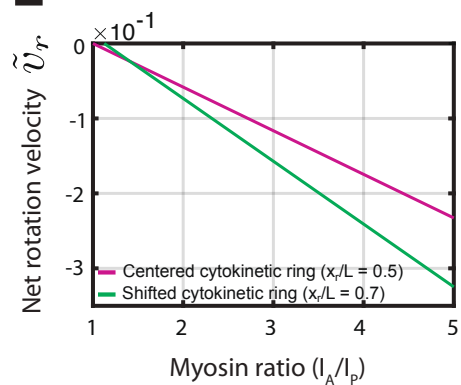

Supplement: supp [file elife-54930-supp-v1.zip]

**A**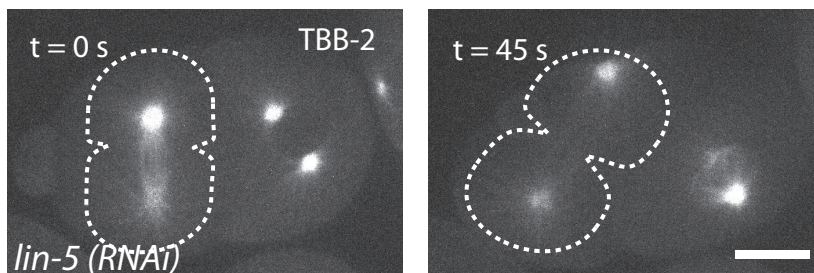**B**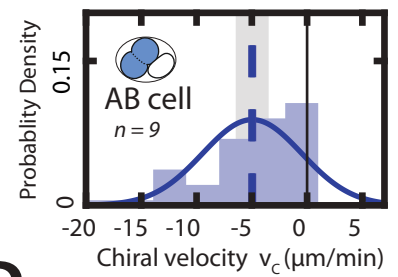**C**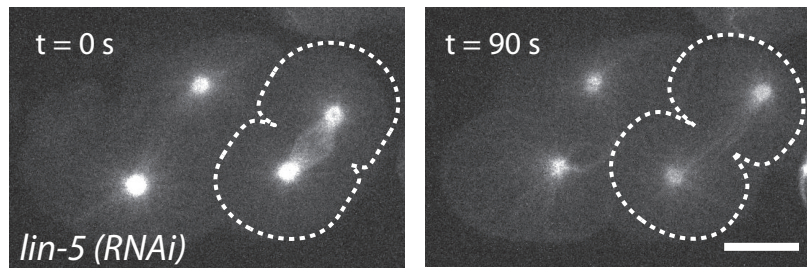**D**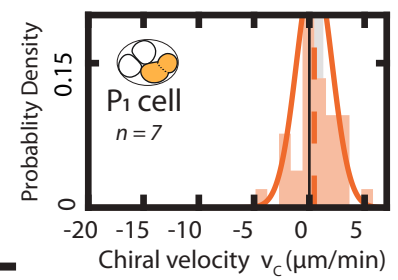**E**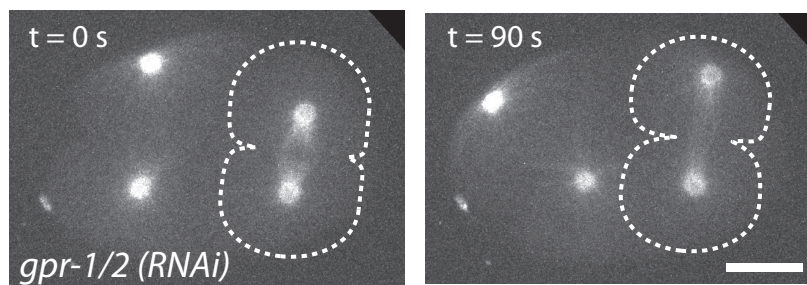**F**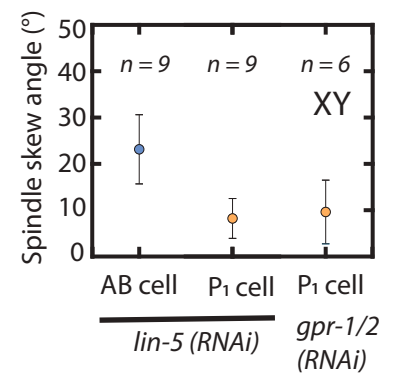

Supplement: supp [file elife-54930-supp-v1.zip]

**A**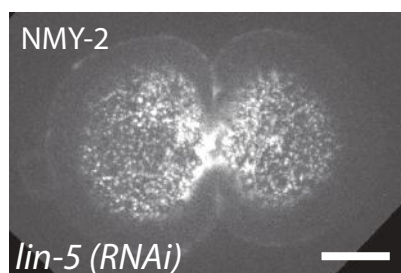**B**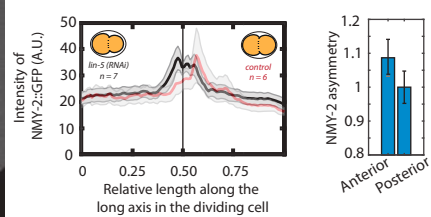**C**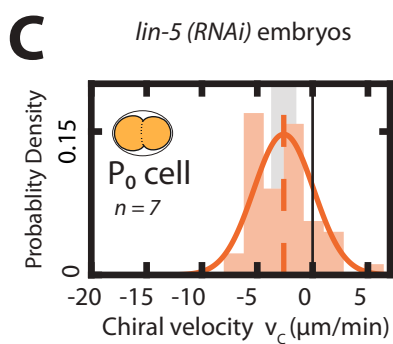

Supplement: supp [file elife-54930-supp-v1.zip]

**A**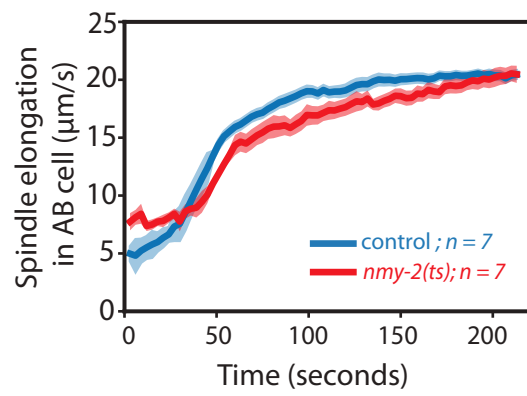**B**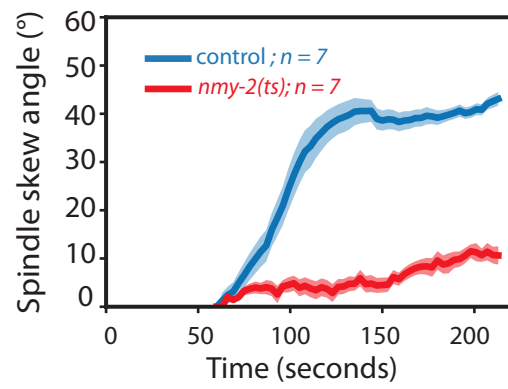

Supplement: supp [file elife-54930-supp-v1.zip]

**A**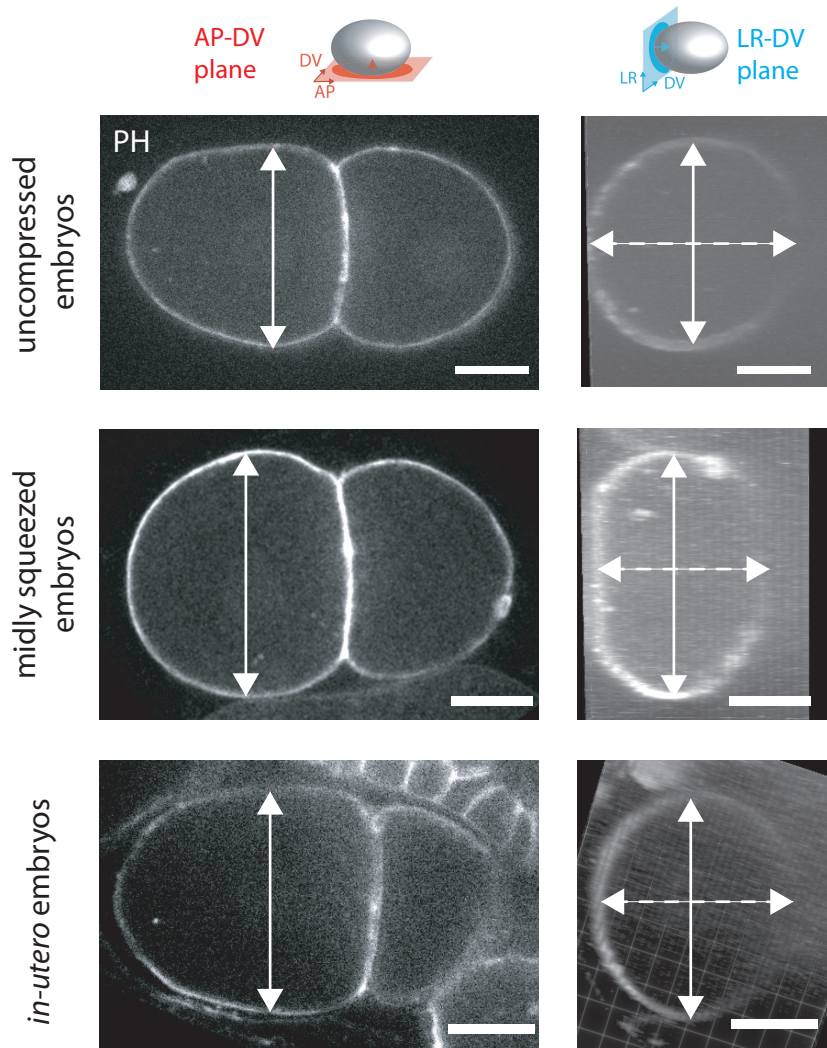**B**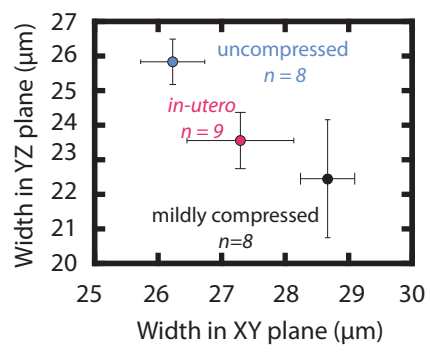

Supplement: supp [file elife-54930-supp-v1.zip]

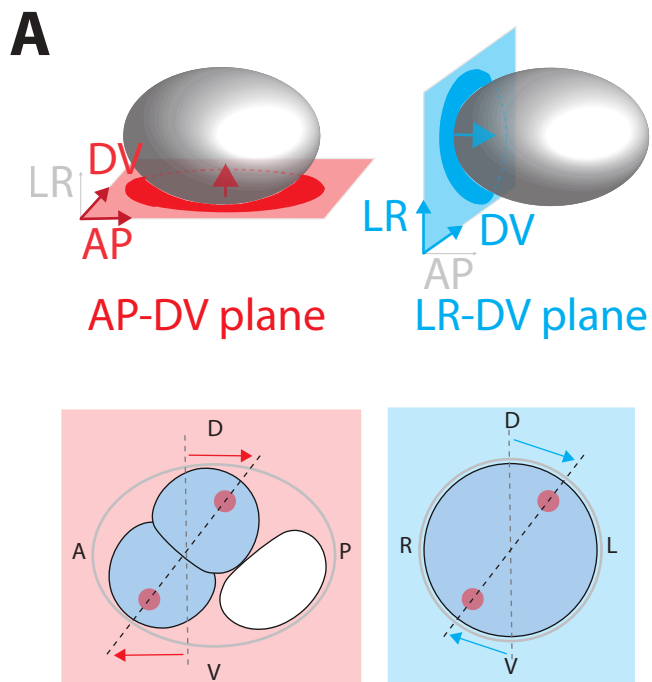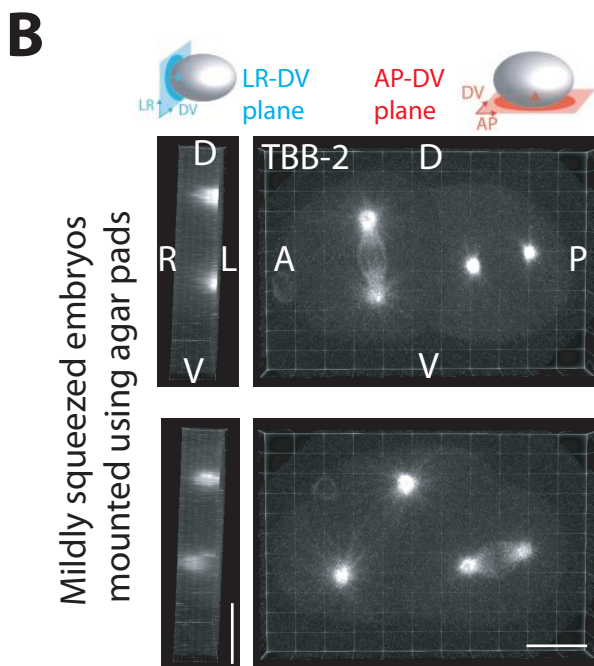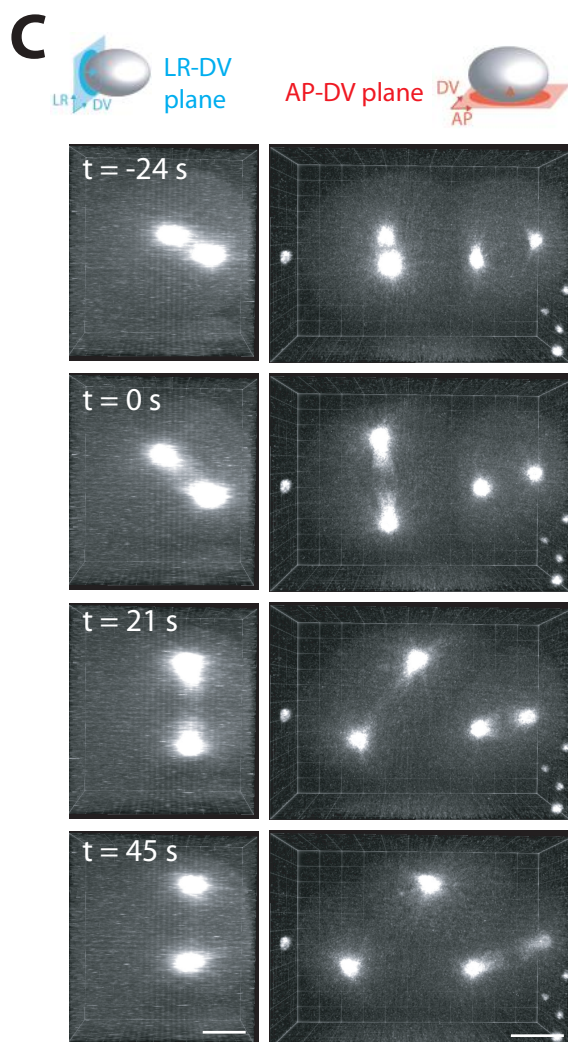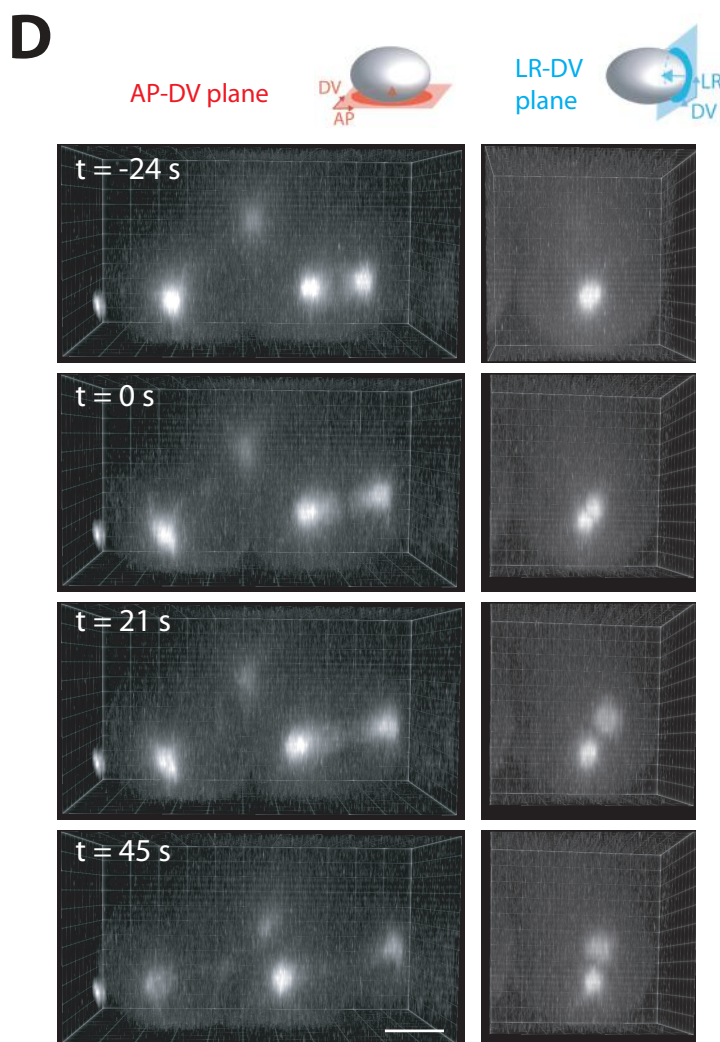

Supplement: supp [file elife-54930-supp-v1.zip]

**A**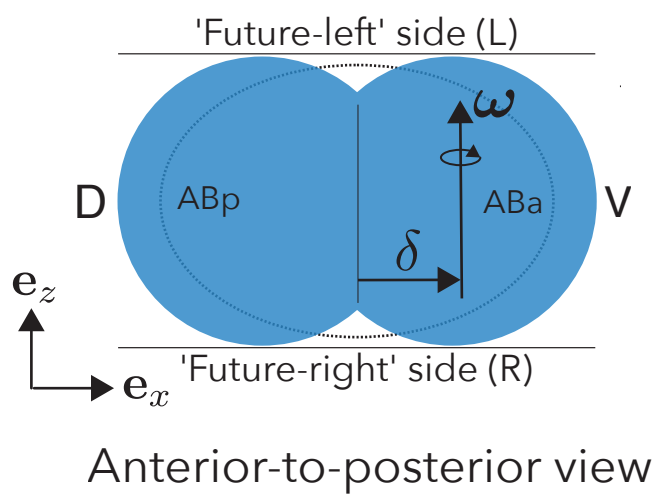**B**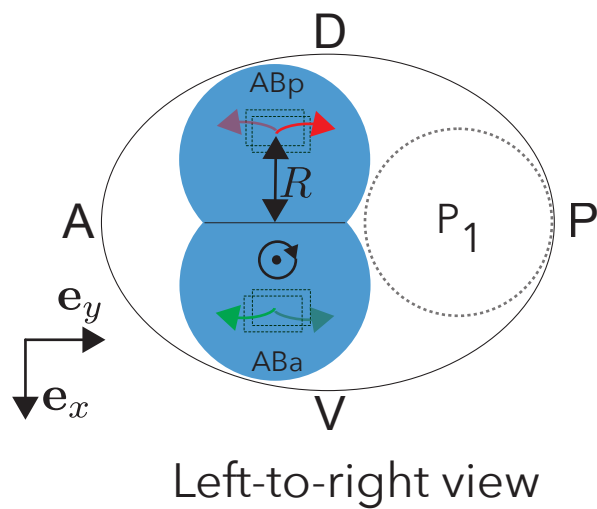**C**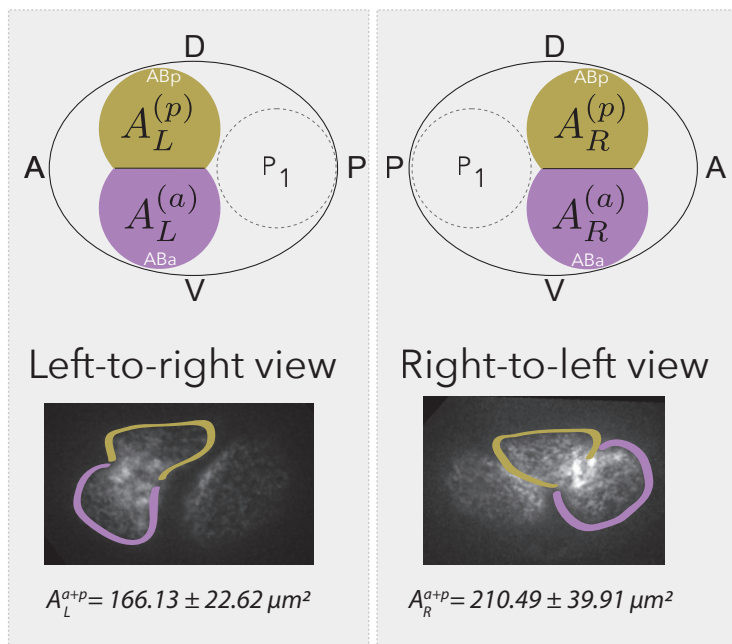**D**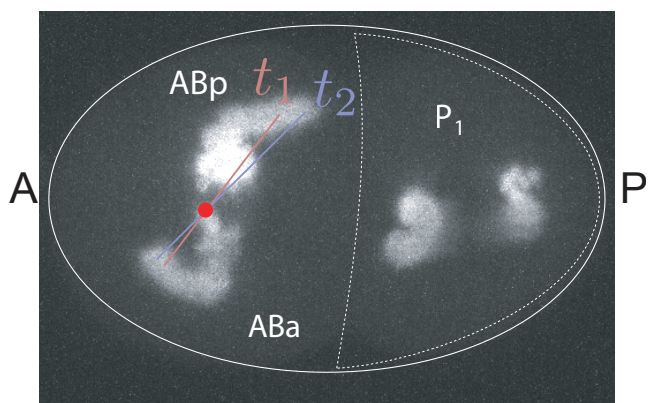**E**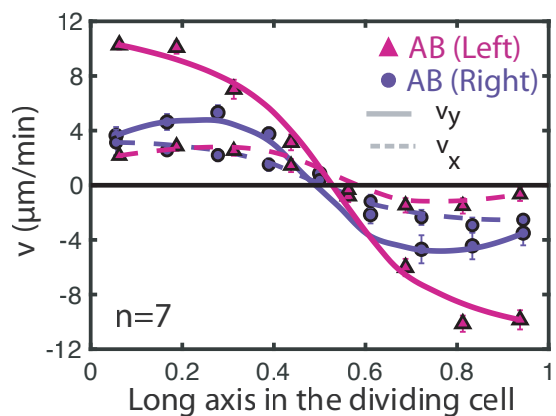

Supplement: supp [file elife-54930-supp-v1.zip]

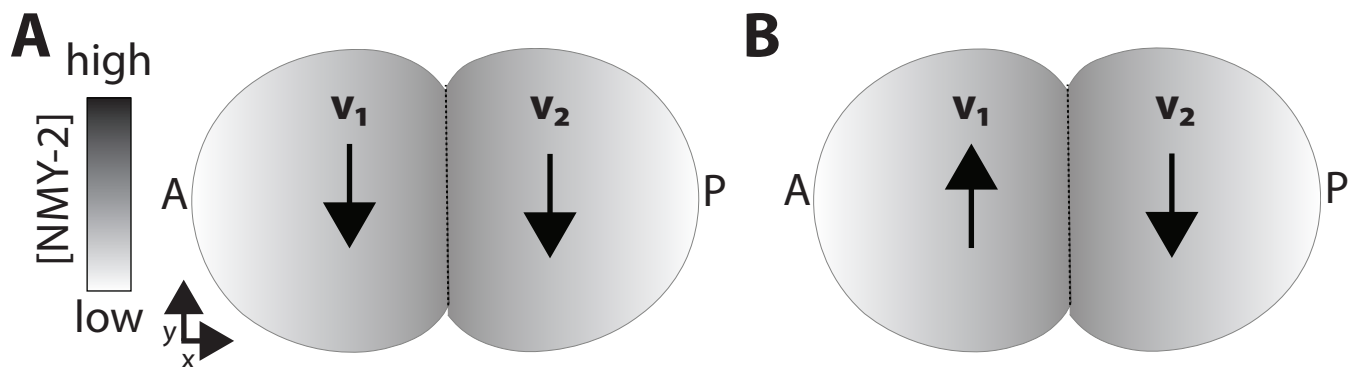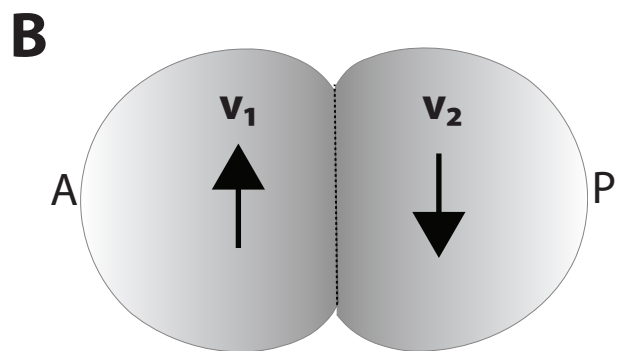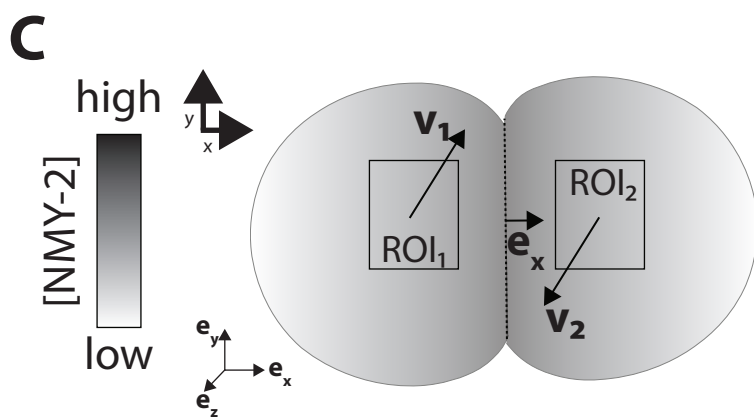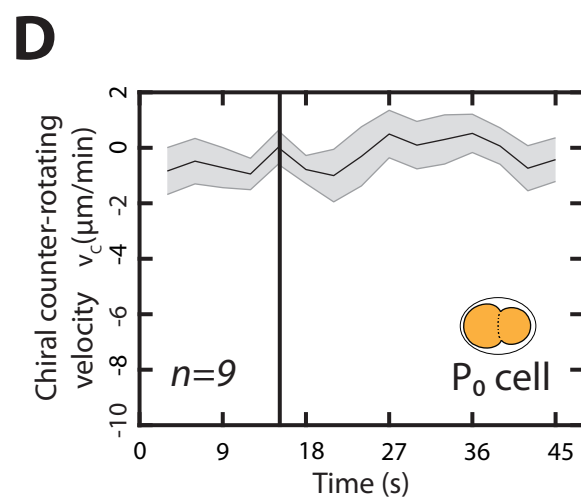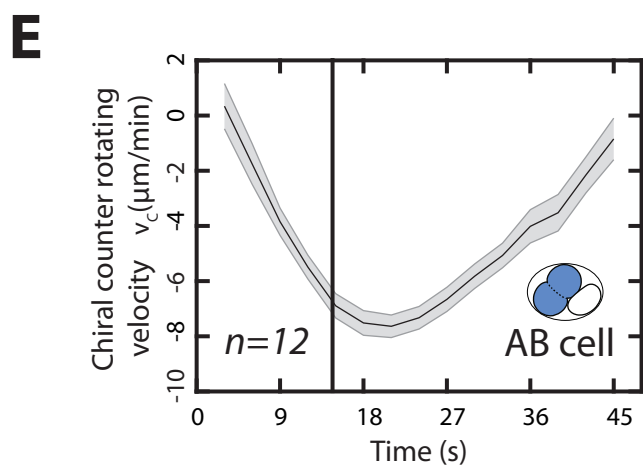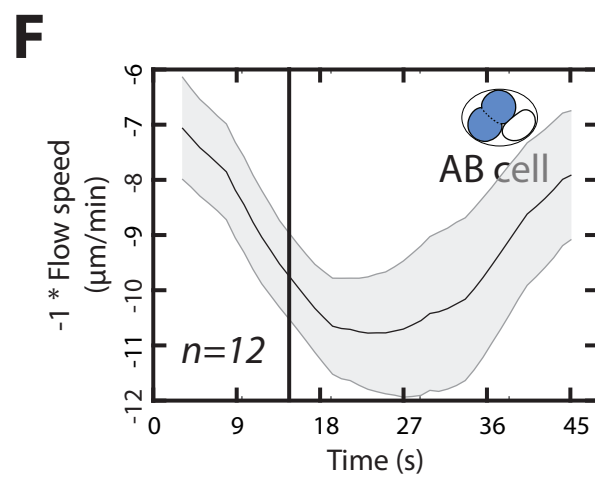

Supplement: supp [file elife-54930-supp-v1.zip › elife_poa_e54930_Figure_1_figure_supplement_2.pdf]

**A**

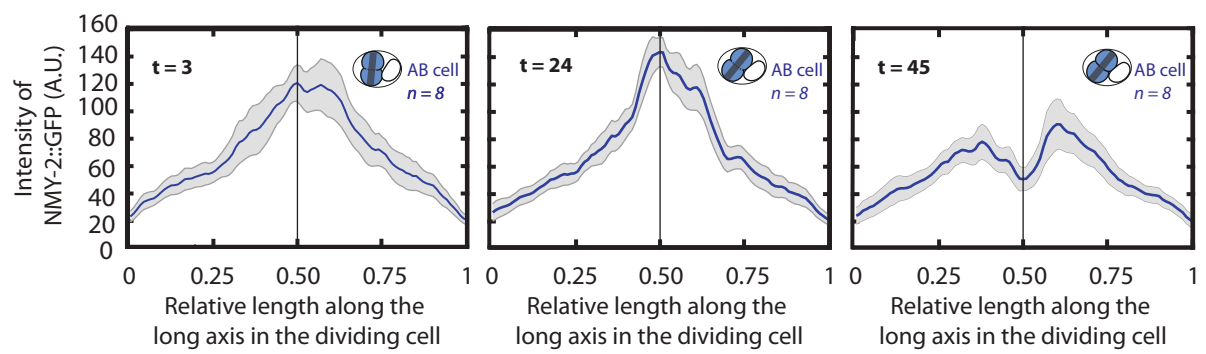

Supplement: supp [file elife-54930-supp-v1.zip › elife_poa_e54930_Figure_1_figure_supplement_3.pdf]

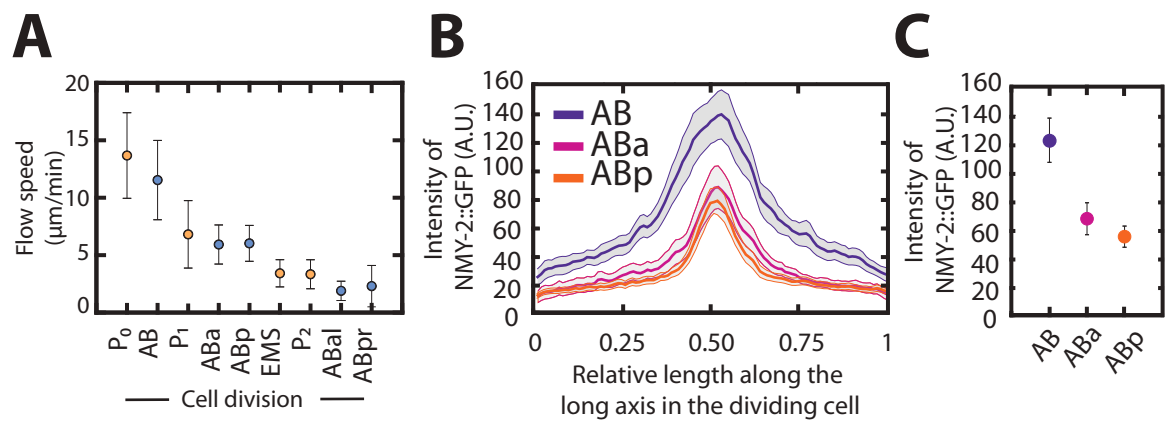

Supplement: supp [file elife-54930-supp-v1.zip › elife_poa_e54930_Figure_1_figure_supplement_5.pdf]

**A**

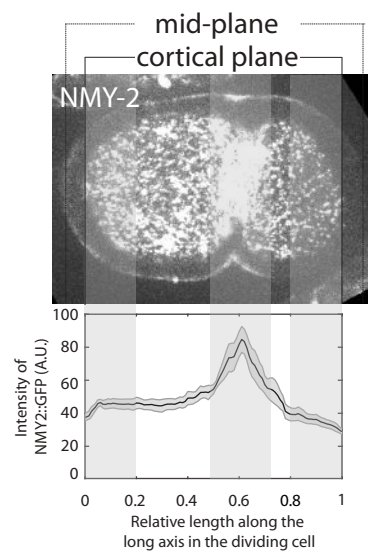

Supplement: supp [file elife-54930-supp-v1.zip › elife_poa_e54930_Figure_1_figure_supplement_6.pdf]

**A**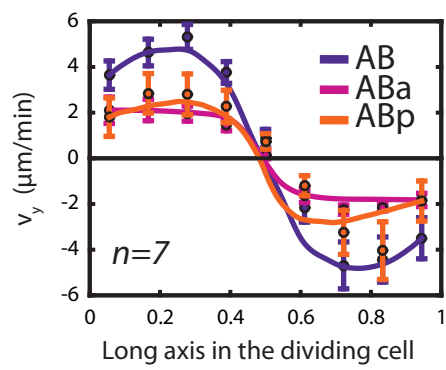**B**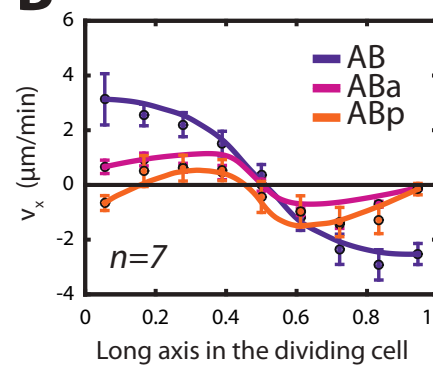

Supplement: supp [file elife-54930-supp-v1.zip › elife_poa_e54930_Figure_1_figure_supplement_8.pdf]

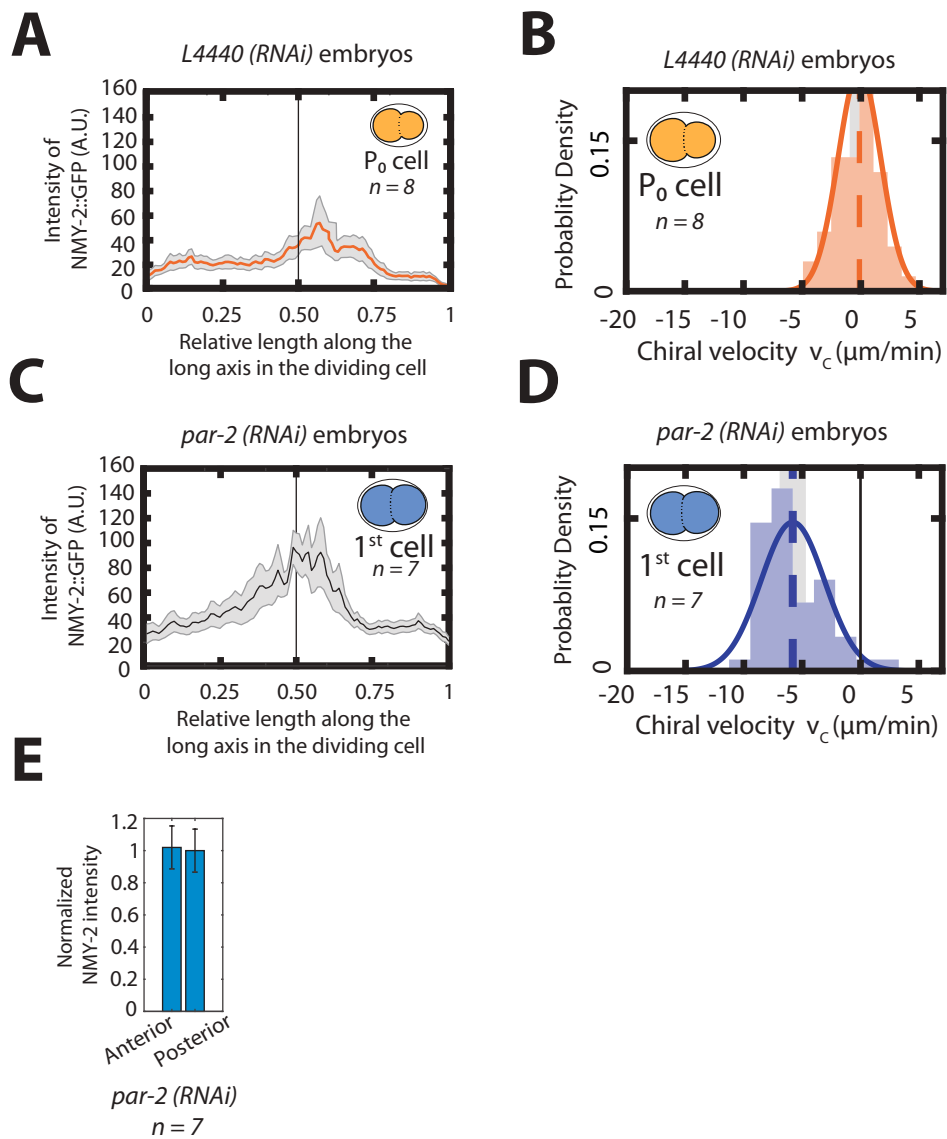

Supplement: supp [file elife-54930-supp-v1.zip › elife_poa_e54930_Figure_1_figure_supplement_9.pdf]

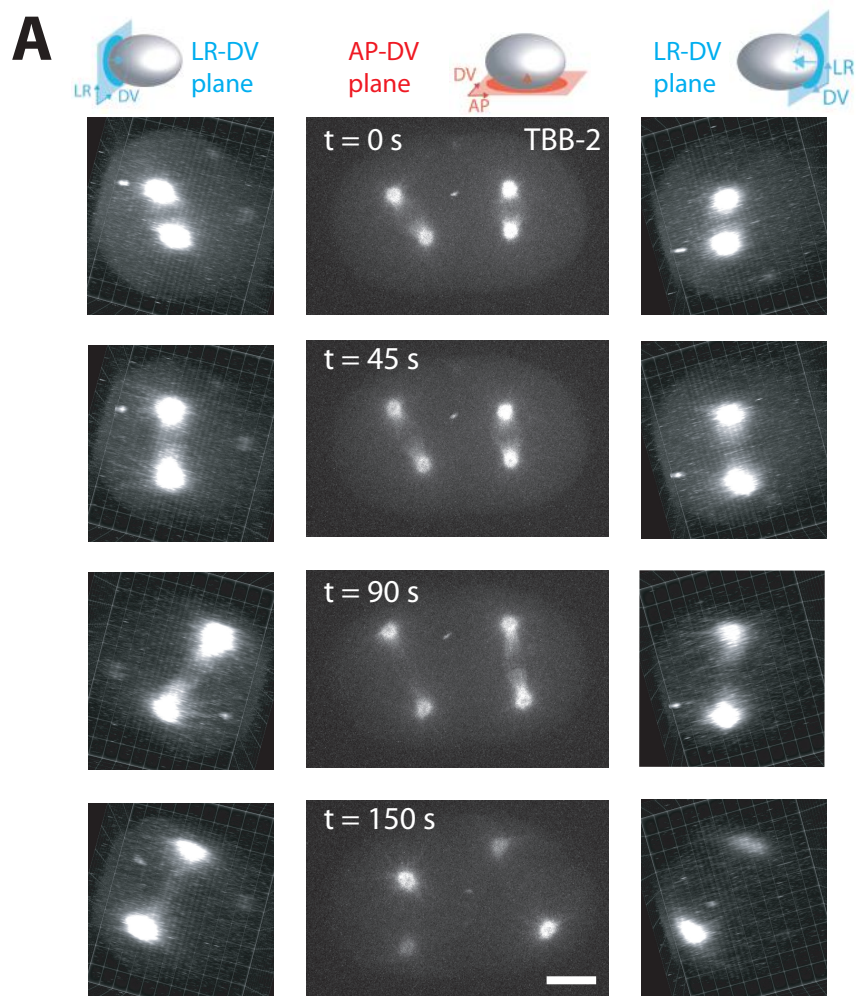

Supplement: supp [file elife-54930-supp-v1.zip › elife_poa_e54930_Figure_3_figure_supplement_2.pdf]

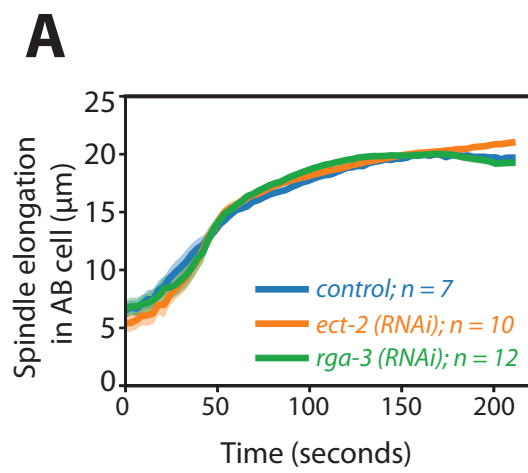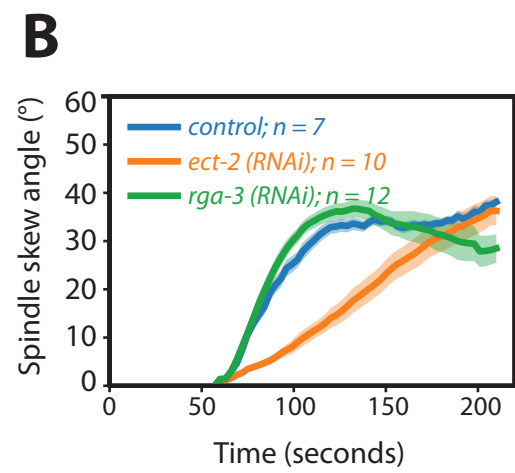

Supplement: supp [file elife-54930-supp-v1.zip › elife_poa_e54930_Figure_4_figure_supplement_1.pdf]

**A**

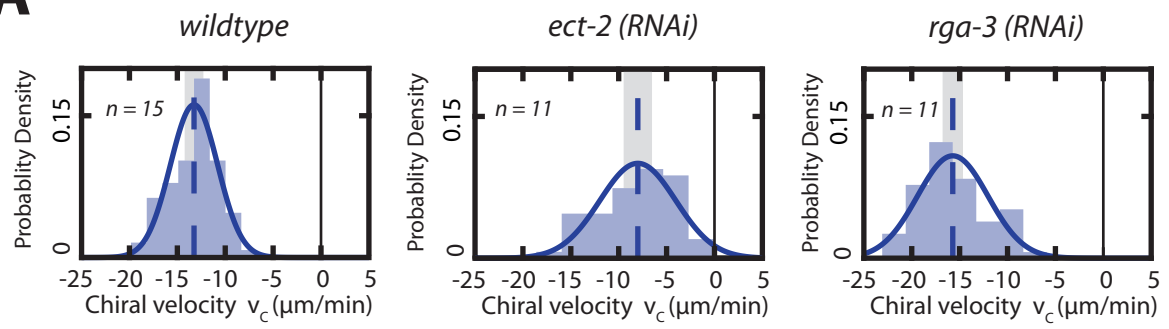

Supplement: supp [file elife-54930-supp-v1.zip › elife_poa_e54930_Figure_5_figure_supplement_2.pdf]
